1 **The *Legionella*-driven PtdIns(4)*P* gradient at LCV-ER membrane contact**  
2 **sites promotes Vap-, OSBP- and Sac1-dependent pathogen vacuole**  
3 **remodeling**

4

5 **Simone Vormittag<sup>1</sup>, Dario Hüsler<sup>1</sup>, Ina Haneburger<sup>1</sup>, Tobias Kroniger<sup>2</sup>, Aby Anand<sup>3</sup>,**  
6 **Manuel Prantl<sup>1</sup>, Caroline Barisch<sup>3</sup>, Sandra Maaß<sup>2</sup>, Dörte Becher<sup>2</sup>, François Letourneur<sup>4</sup>**  
7 **& Hubert Hilbi<sup>1\*</sup>**

8 <sup>1</sup>Institute of Medical Microbiology, University of Zürich, Gloriastrasse 30, 8006 Zürich,  
9 Switzerland.

10 <sup>2</sup>Institute of Microbiology, University of Greifswald, Felix-Hausdorff-Strasse 8, 17489  
11 Greifswald, Germany.

12 <sup>3</sup>Division of Molecular Infection Biology and Center for Cellular Nanoanalytics, University  
13 of Osnabrueck, Barbarastrasse 13, 49076 Osnabrueck, Germany.

14 <sup>4</sup>Laboratory of Pathogen Host Interactions, Université de Montpellier, CNRS, INSERM,  
15 Place Eugène Bataillon, Montpellier, 34095, cedex 5, France.

16

17 **Running title:** LCV remodeling through ER membrane contact sites

18 **Key words:** Amoeba, atlastin, *Dictyostelium discoideum*, large fusion GTPase, host-pathogen  
19 interaction, *Legionella pneumophila*, Legionnaires' disease, oxysterol binding protein,  
20 pathogen vacuole.

21 **Abbreviations:** ATL, Atlastin, FFAT motif, two phenylalanines (FF) in an acidic tract motif;  
22 Icm/Dot, intracellular multiplication/defective organelle trafficking; IFC, imaging flow  
23 cytometry; LCV, *Legionella*-containing vacuole; GFP, green fluorescent protein; MCS,  
24 membrane contact sites; OSBP, oxysterol binding protein; T4SS, type IV secretion system;  
25 VAMP, vesicle-associated membrane protein; Vap, VAMP-associated protein.

26 **\*Correspondence:** hilbi@imm.uzh.ch; Tel.: +41 (0)44 634 2650

## 27 **Abstract**

28 The causative agent of Legionnaires' disease, *Legionella pneumophila*, governs interactions  
29 with host cells by secreting ca. 330 different "effector" proteins. The facultative intracellular  
30 bacteria replicate in macrophages and amoeba within a unique compartment, the *Legionella*-  
31 containing vacuole (LCV). Hallmarks of LCV formation are the phosphoinositide (PI) lipid  
32 conversion from PtdIns(3)*P* to PtdIns(4)*P*, fusion with endoplasmic reticulum (ER)-derived  
33 vesicles and a tight association with the ER. Proteomics of purified LCVs revealed the  
34 presence of membrane contact sites (MCS) proteins implicated in lipid exchange. Using  
35 dually fluorescence-labeled *Dictyostelium discoideum* amoeba, we reveal that the VAMP-  
36 associated protein (Vap), the PtdIns(4)*P* 4-phosphatase Sac1, and the large fusion GTPase  
37 Sey1/atlastin-3 localize to the ER, but not to the LCV membrane, and that these ER-resident  
38 proteins promote intracellular replication of *L. pneumophila* and LCV remodeling. Moreover,  
39 oxysterol binding proteins (OSBPs) preferentially localize to the ER (OSBP8) or the LCV  
40 membrane (OSBP11), respectively, and promote (OSBP8) or restrict (OSBP11) intracellular  
41 replication of *L. pneumophila* and LCV expansion. Furthermore, the PtdIns(4)*P*-subverting *L.*  
42 *pneumophila* effectors LepB and SidC also promote LCV remodeling. Taken together, the  
43 *Legionella*- and host cell-driven PtdIns(4)*P* gradient at LCV-ER MCSs promotes Vap-,  
44 OSBP- and Sac1-dependent pathogen vacuole remodeling.

45

## 46 **Introduction**

47 *Legionella pneumophila* is an amoeba-resistant environmental bacterium, which causes a  
48 severe pneumonia called Legionnaires' disease [1, 2]. The facultative intracellular pathogen  
49 employs a conserved mechanism to grow in free-living protozoa as well as in alveolar  
50 macrophages, which is a prerequisite to cause disease [3-6]. To govern the interaction with  
51 host cells, *L. pneumophila* employs the Icm/Dot (Intracellular multiplication/defective  
52 organelle trafficking) type IV secretion system (T4SS), which translocates ca. 330 different

53 “effector” proteins into host cells [6, 7]. These effector proteins subvert pivotal host cell  
54 processes, including the endocytic, secretory, retrograde and autophagy pathways, lipid  
55 metabolism, transcription, translation, and apoptosis [8-12].

56 Within host cells, *L. pneumophila* forms a unique, membrane-bound replication  
57 compartment, the *Legionella*-containing vacuole (LCV), which restricts interactions with the  
58 endocytic pathway [13-16]. Hallmarks of LCV formation are the phosphoinositide (PI) lipid  
59 conversion from phosphatidylinositol 3-phosphate (PtdIns(3)*P*) to PtdIns(4)*P*, the subversion  
60 of the small GTPase Rab1, fusion of the pathogen vacuole with endoplasmic reticulum (ER)-  
61 derived vesicles, and finally, a tight association with the ER [13-16]. The LCV is decorated  
62 with PtdIns(4)*P* [17], and PI conversion from the endocytic PI PtdIns(3)*P* to the secretory PI  
63 PtdIns(4)*P* occurs in the first 1-2 hours after bacterial uptake [18].

64 The production of PtdIns(4)*P* on the LCV membrane implicates the sequential activity of  
65 *L. pneumophila* Icm/Dot-secreted effector proteins: PtdIns 3-kinase MavQ [19], PtdIns(3)*P* 4-  
66 kinase LepB [20] and PtdIns(3,4)*P*<sub>2</sub> 3-phosphatase SidF [21]. Moreover, host PI-modulating  
67 enzymes such as the PtdIns 4-kinases PI4KIII $\alpha$  [22] and PI4KIII $\beta$  [23], and the PtdIns(4,5)*P*  
68 5-phosphatase OCRL1 [24] might also play a role in the production of PtdIns(4)*P* on the LCV  
69 membrane.

70 The small GTPase Rab1 is enriched in the *cis*-Golgi apparatus and controls ER-Golgi  
71 secretory trafficking [14]. Rab1 is recruited to the LCV membrane and activated by the  
72 Icm/Dot secreted effector SidM (*alias* DrrA), which binds to PtdIns(4)*P* through the novel  
73 P4M domain [22, 23, 25-27] and possess Rab1 guanine nucleotide exchange factor (GEF)/  
74 guanine dissociation inhibitor (GDI) displacement factor (GDF) activity [28-34] as well as  
75 adenosine monophosphorylation (AMPylation) activity [35, 36]. Moreover, Rab1 is de-  
76 AMPylated by the effector SidD [37, 38] and reversibly phosphocholinated by the effectors  
77 AnkX and Lem3 [39-41]. The covalent modifications of GTP-bound Rab1 lock the small  
78 GTPase in its active state. Finally, Rab1 is inactivated by the GTPase activating protein

79 (GAP) LepB [31]. The small GTPase ARF1 controls also retrograde Golgi-ER trafficking  
80 [14]. ARF1 is recruited to and activated on the LCV by the effector RalF, the first *L.*  
81 *pneumophila* GEF identified [42].

82 The LCV intercepts trafficking at ER exit sites between the ER and the Golgi apparatus,  
83 and inhibition of ER-Golgi transport blocks the formation of the pathogen vacuole [42-44].  
84 Sec22b, a SNARE (soluble *N*-ethylmaleimide-sensitive factor (NSF) attachment protein  
85 (SNAP) receptor), which promotes fusion of ER-derived vesicles with the *cis*-Golgi, is  
86 recruited to LCVs shortly after infection [45, 46]. The activation of Rab1 by SidM on the  
87 LCV mediates the fusion of ER-derived vesicles with the pathogen vacuole through the non-  
88 canonical pairing of the vesicle (v-)SNARE Sec22b on the vesicles with plasma membrane  
89 (PM)-derived target (t-)SNAREs such as syntaxin (Stx) 2, 3, 4 and SNAP23 on the LCV [47,  
90 48]. The LCV intercepts anterograde as well as retrograde trafficking between the ER and the  
91 Golgi apparatus [9, 11, 13, 14]. Accordingly, nascent LCVs continuously capture and  
92 accumulate PtdIns(4)*P*-positive vesicles from the Golgi apparatus, and their sustained  
93 association requires a functional T4SS [49]. LCVs also sequentially recruit the small GTPases  
94 Rab33b, Rab6a and the ER-resident SNARE syntaxin18 (Stx18), which are implicated in  
95 Golgi-ER retrograde trafficking, to promote the association of the pathogen vacuole with the  
96 ER [50].

97 The association of the LCV with ER in macrophages and amoeba has been initially  
98 documented more than 25 years ago [51, 52]. The vacuole containing *L. pneumophila*  
99 associates with rough ER within minutes after uptake, and dependent on the Icm/Dot T4SS,  
100 the vacuole and the ER form extended contact sites ( $> 0.5 \mu\text{m}$  in length), which are connected  
101 by tiny, periodic “hair-like” structures [53]. Remarkably, the ER elements remain attached to  
102 LCVs even after cell homogenization [53], and intact LCVs purified from *L. pneumophila*-  
103 infected *D. discoideum* co-purify with extensive fragments of calnexin-GFP-positive ER [54-  
104 56]. In dually fluorescence labeled *D. discoideum*, LCVs accumulate calnexin-positive ER

105 within minutes, and the ER remains separate from the PtdIns(4)*P*-positive pathogen vacuole  
106 for at least 8 h post infection [18, 57]. The ER tubules interacting with LCVs are decorated  
107 with reticulon 4 (Rtn4) and the large fusion GTPase atlastin/Sey1, which are implicated in the  
108 architecture and dynamics of the ER, respectively [58, 59]. The *L. pneumophila* effector Ceg9  
109 might stabilize the LCV-ER contact sites by directly binding to the host protein Rtn4 [58].  
110 Finally, depletion of the PtdIns(4)*P* 4-phosphatase Sac1, a crucial enzyme of ER membrane  
111 contact sites (MCS), reduced the recruitment of endogenous Rab1 to LCVs [22].

112 The MCS between two distinct cellular compartments or organelles adopt a number of  
113 functions and are of crucial importance for the non-vesicular exchange of lipids in  
114 mammalian cells [60]. MCS between the ER and the PM or organelles promote lipid  
115 exchange driven by a gradient of PtdIns(4)*P*, which is established by PtdIns 4-kinases on the  
116 PM or organelles and maintained by the integral ER membrane protein PtdIns(4)*P* 4-  
117 phosphatase Sac1 [61, 62]. Driven by the PtdIns(4)*P* gradient, phosphatidylserine  
118 accumulates at the inner leaflet of the PM [63, 64] and cholesterol accumulates at the Golgi  
119 apparatus [61, 65]. The lipid exchange is promoted by lipid transfer proteins termed oxysterol  
120 binding proteins (OSBPs), several of which bind PtdIns(4)*P* through a PH domain and by the  
121 ER-resident Vap (vesicle-associated membrane protein (VAMP)-associated protein) through a  
122 FFAT (two phenylalanines (FF) in an acidic tract) motif [60].

123 Given the accumulation of PtdIns(4)*P* on the limiting LCV membrane and the tight  
124 association of the pathogen vacuole with ER, the LCV-ER interface might actually form  
125 functionally important MCS, which promote pathogen vacuole remodeling through a  
126 PtdIns(4)*P* gradient. Using dually fluorescence-labeled *D. discoideum* amoeba, we identify  
127 Vap, Sac1 and Sey1 on the ER, but not on the LCV membrane, while OSBP8 and OSBP11  
128 exclusively localize to the ER or the LCV membrane, respectively. The MCS components are  
129 implicated in LCV remodeling and intracellular growth of *L. pneumophila*, and a LCV-to-ER  
130 PtdIns(4)*P* gradient is established by bacterial effector proteins. These findings indicate that

131 the *Legionella*-driven PtdIns(4)*P* gradient at LCV-ER MCSs promotes Vap-, Sac1- and  
132 OSBP-dependent pathogen vacuole remodeling.

133

## 134 **Results**

### 135 **Comparative proteomics of LCVs from *D. discoideum* wild-type and $\Delta$ *sey1* reveals MCS** 136 **components**

137 Given the tight and stable association of the LCV limiting membrane with the ER, MCS are  
138 likely formed between the compartments. The ER tubule-resident large GTPase Sey1/Atl3  
139 (DDB\_G0279823) promotes the decoration of LCVs with ER, and in absence of the GTPase,  
140 significantly less ER accumulates on the pathogen vacuole, while the PtdIns(4)*P*-positive  
141 LCV appears to form normally [59, 66]. To gain further insights into the process of LCV  
142 formation, and in particular the role of the ER, we analyzed by comparative proteomics LCVs  
143 from the *L. pneumophila*-infected *D. discoideum* Ax3 wild-type strain or the  $\Delta$ *sey1* mutant.  
144 This approach revealed 3658 host or bacterial proteins identified on LCVs from *D.*  
145 *discoideum* Ax3 or  $\Delta$ *sey1* (**Table S1**).

146 These proteins include the OSBPs OSBP7 (*osbG*) and OSBP8 (*osbH*), the PtdIns(4)*P* 4-  
147 phosphatase Sac1, the hydrolase receptor sortilin, the ER proteins calnexin, calmodulin,  
148 calreticulin and reticulon, the ER-Golgi intermediate compartment protein-3 (Ergic3), the  
149 Golgi proteins golgesin and YIPF1, the vesicle transport through interaction with t-SNAREs  
150 homolog 1A (Vti1A), the vesicle-associated membrane protein-7A/B (Vamp7A/B), the  
151 vesicle-fusing ATPase (NsfA), the vacuolar protein sorting-associated proteins Vps26, Vps29,  
152 and Vps35 (retromer coat complex subunits), dynamin A/B (DymA/B), dynamin-like protein  
153 A/C (DlpA/C), Vps4, Vps11, Vps13A, Vps16, Vps45, Vps51, Vps53, syntaxins (5, 7A/B,  
154 8A/B), t-SNAREs, synaptobrevin B,  $\alpha$ -SNAP, and many small GTPases or their modulators  
155 (Arf1, Arf1 GEF, Arl8, Rab1A/B/C/D, Rab2A/B, Rab4, Rab5A/B, Rab6, Rab7A, Rab8A,  
156 Rab11A/C, Rab14, Rab18, Rab21, Rab32A/B/C/D, RabC, RabJ, RabG2, RabQ, Rab GDI,

157 Rac1A, RacB, RacE, RagA, RanA, RanBP1, RasB, RasC, RasG, RasS, RapA, Rap GAP, Rho  
158 GAP, Rho GDI, Sar1, Spg1), as well as the interaptin AbpD [67], the metal ion transporter  
159 Nramp1 [68, 69], and the GPCR and receptor protein kinase RpkA [70]. Moreover, many  
160 mitochondrial proteins were found to associate with LCVs (**Table S1**). Finally, the *L.*  
161 *pneumophila* PtdIns 4-kinase LepB [20], the PtdIns(4)*P*-binding effectors SidC, its paralogue  
162 SdcA, and SidM/DrrA [17, 23, 71], as well as the retromer interactor RidL [72] and the  
163 deAMPyase SidD [37, 38] were also identified on LCVs from *D. discoideum* Ax3 and  $\Delta$ *sey1*  
164 (**Table S1**).

165 Furthermore, 74 *D. discoideum* or 34 *L. pneumophila* proteins were identified only on  
166 LCVs from *D. discoideum* Ax3, while 11 host and 3 bacterial proteins were present only on  
167 LCVs from  $\Delta$ *sey1* mutant amoeba (**Fig. 1A, Table S1**). Among the host proteins present only  
168 on LCVs from *D. discoideum* Ax3, we identified several putative MCS components possibly  
169 involved in (PI-driven) lipid transport (OSBP7, Vps13B, CRAL-TRIO domain protein), as  
170 well as proteins possibly implicated in ER-Golgi transport (TRAPPC3, YIPF5,  $\gamma$ -SNAP), or  
171 localizing to the ER (syntaxin18, calmodulin, Sey1) (**Table S1**). Among the *L. pneumophila*  
172 proteins identified only on LCVs from *D. discoideum*  $\Delta$ *sey1* was the PtdIns(4)*P*-binding  
173 effector Lpg2603 [73] (**Table S1**). Based on these findings, we sought to analyze *D.*  
174 *discoideum* factors possibly involved in LCV-ER MCS.

175 *D. discoideum* harbors single putative orthologues of the PtdIns(4)*P* 4-phosphatase Sac1  
176 (DDB\_G0271630), and the VAMP-associated protein (Vap; DDB\_G0278773), as well as  
177 several OSBPs, including OSBP7 (DDB\_G0283035; *osbG*), OSBP8 (DDB\_G0283709; *osbH*)  
178 and OSBP11 (DDB\_G0288817; *osbK*). All 12 *D. discoideum* OSBPs belong to the class of  
179 “short OSBPs”, which harbor a putative lipid-binding ORD domain (OSBP-related domain)  
180 but lack ankyrin repeats (protein-protein interaction), a PH domain (PI binding), a trans-  
181 membrane domain (TMD; membrane interaction), and the FFAT motif (Vap interaction) (**Fig.**  
182 **S1**). OSBP8 and OSBP11 are most similar to one another and most closely related to human

183 short OSBPs. OSBP7 represents an OSBP more distantly related to the other paralogues, and  
184 OSBP1 (*osbA*), OSBP2 (*osbB*), OSBP3 (*osbC*), OSBP5 (*osbE*) and OSBP6 (*osbF*) form a  
185 separate cluster.

186 In order to validate the localization of MCS components to LCVs, GFP fusion proteins of  
187 Vap, OSBP7, OSBP8, OSBP11 or Sac1 were co-produced alongside the PtdIns(4)*P*/LCV  
188 probe P4C-mCherry [59] in *D. discoideum* Ax3 or  $\Delta$ *sey1*, and their localization to LCVs was  
189 assessed by imaging flow cytometry (IFC) (**Fig. 1B**). All putative MCS components were  
190 found to localize to PtdIns(4)*P*-positive LCVs, and Vap accumulated on significantly fewer  
191 LCVs in  $\Delta$ *sey1* mutant amoeba. Since IFC has a rather low spatial resolution, the PtdIns(4)*P*-  
192 positive limiting LCV membrane cannot be discriminated from tightly associated ER. In  
193 summary, comparative proteomics identified MCS components on purified LCVs, the  
194 localization of which to the pathogen vacuole was confirmed by IFC.

195

#### 196 ***D. discoideum* MCS components localize to the ER or the LCV membrane**

197 Based on the above bioinformatic and experimental considerations, we sought to analyze the  
198 role of the putative MCS components Vap, OSBP7, OSBP8, OSBP11 and Sac1 for LCV  
199 formation and the LCV-ER MCS in detail. Using dually fluorescently labeled *D. discoideum*,  
200 we assessed by confocal fluorescence microscopy the co-localization of GFP fusions of Vap,  
201 OSBP7, OSBP8, OSBP11 or Sac1 with either the ER-resident protein calnexin A-mCherry  
202 (CnxA-mCherry), the PtdIns(4)*P*/LCV probe P4C-mCherry, or the endosomal transporter  
203 AmtA-mCherry (**Fig. 2A, Fig. S2A**). This high-resolution approach revealed that Vap and  
204 OSBP8, but significantly less OSBP7 and OSBP11, co-localize with CnxA-mCherry in *L.*  
205 *pneumophila*-infected (**Fig. 2B**) as well as in uninfected amoeba (**Fig. S2B-D**). The  
206 PtdIns(4)*P* 4-phosphatase Sac1 and its catalytically inactive mutant, Sac1\_C383S, also co-  
207 localized with CnxA-mCherry, while a Sac1 variant lacking the ER-targeting transmembrane  
208 domain, Sac1\_ΔTMD, diffusely localized throughout the cell (**Fig. 2B**). Moreover, Vap and



209 OSBP11 co-localized with P4C-mCherry, while OSBP7, OSBP8 and Sac1 did not (**Fig. 2C**),  
210 and Vap and OSBP11 also co-localized with AmtA-mCherry more extensively than the other  
211 MCS components (**Fig. 2D**). Finally, OSBP11 intensely localized to the PM. In summary,  
212 Vap, OSBP8 and Sac1 co-localize with ER-resident CnxA-mCherry, and Vap as well as  
213 OSBP11 co-localize with the PtdIns(4)*P* probe P4C-mCherry and the endosomal/LCV marker  
214 AmtA-mCherry (**Table 1**). Hence, at LCV-ER MCS Vap localizes to LCVs as well as to the  
215 ER, while OSBP8 and Sac1 preferentially localize to the ER, and OSBP11 preferentially  
216 localizes to LCVs.

217

### 218 **MCS components modulate the replication of *L. pneumophila* in *D. discoideum* and** 219 **mammalian cells**

220 To further assess the role of the MCS components for intracellular replication of *L.*  
221 *pneumophila* and LCV formation, we constructed *D. discoideum* deletion mutant strains  
222 lacking *vap*, *osbG*, *osbH* or *osbK* by disrupting the corresponding genes with a blasticidin  
223 selection marker (**Fig. S3**). Several independent clones of the deletion mutants were picked  
224 and further analyzed. Despite repeated attempts, we failed to obtain a  $\Delta sac1$  deletion mutant,  
225 and therefore, the gene might be essential in *D. discoideum*. Instead, we constructed and used  
226 a dominant negative Sac1 variant lacking the ER-targeting transmembrane domain,  
227 Sac1\_ΔTMD, and the catalytically inactive Sac1\_C383S mutant.

228 To assess the role of these putative MCS components for intracellular replication of *L.*  
229 *pneumophila*, we used mCherry-producing bacteria and quantified fluorescence intensity  
230 (RFU) (**Fig. 3**) and colony forming units (CFU) (**Fig. S4A**). We compared intracellular  
231 growth of the wild-type *L. pneumophila* strain JR32 in *D. discoideum*  $\Delta vap$ , as well as in the  
232  $\Delta osbG$ ,  $\Delta osbH$ , and  $\Delta osbK$  mutant strains (**Fig. 3A**). In *D. discoideum*  $\Delta vap$ , intracellular  
233 bacterial growth was reduced at 4-8 days post infection (p.i.) and enhanced at 10 days p.i.  
234 Moreover, intracellular bacterial growth was enhanced in *D. discoideum*  $\Delta osbH$ , reduced in

235  $\Delta osbK$  and not affected in  $\Delta osbG$ . The intracellular growth phenotypes of *L. pneumophila* in  
236 the *D. discoideum*  $\Delta vap$ ,  $\Delta osbH$  and  $\Delta osbK$  mutants were reverted by expressing the  
237 corresponding genes on a plasmid (**Fig. 3A**). The intracellular growth of *L. pneumophila*  
238 strain JR32 was similar in *D. discoideum* Ax3 producing GFP, GFP-Sac1 or GFP-  
239 Sac1\_C383S but significantly reduced in amoeba producing GFP-Sac1\_ΔTMD (**Fig. 3B, Fig.**  
240 **S4A**). These results are in agreement with the notion that Sac1 is implicated in intracellular  
241 growth of *L. pneumophila*, and Sac1\_ΔTMD but not GFP-Sac1\_C383S interfere with growth  
242 in a dominant negative manner. An *L. pneumophila*  $\Delta icmT$  mutant, lacking a functional  
243 Icm/Dot T4SS, did not replicate in any of the *D. discoideum* mutant strains (data not shown).  
244 Taken together, compared to the parental *D. discoideum* strain, *L. pneumophila* replicates less  
245 efficiently in absence of the MCS components Vap or OSBP11 and upon the production of  
246 Sac1\_ΔTMD, while the bacteria replicate more efficiently in absence of OSBP8 (**Table 1**).

247 OSBPL8 was identified on LCVs purified from *L. pneumophila*-infected RAW 264.7  
248 macrophages [55, 56], suggesting that OSBPs and MCS components might also play a role  
249 for LCV formation in mammalian cells. To assess the role of MCS components for  
250 intracellular replication of *L. pneumophila* in mammalian cells, we used a pharmacological  
251 approach and RNA interference. Upon treatment of RAW 264.7 macrophages with the  
252 steroidal saponin OSBP inhibitor OSW-1 [65], the intracellular replication of GFP-producing  
253 *L. pneumophila* JR32 was significantly inhibited in a dose-dependent manner (**Fig. 3C**).  
254 Furthermore, the depletion of Sac1 by RNA interference reduced the intracellular replication  
255 of *L. pneumophila* in A549 lung epithelial cells by approximately 25% (**Fig. 3D, Fig. S4BC**),  
256 similarly to the depletion of the small GTPase Arf1 used as a positive control [59]. Taken  
257 together, pharmacological and RNA interference experiments indicate that MCS components  
258 also promote the intracellular replication of *L. pneumophila* in mammalian cells.

259

260 ***D. discoideum* Vap, OSBP11 and Sac1 promote the expansion of PtdIns(4)P-positive**  
261 **LCVs**

262 Next, we sought to correlate the intracellular replication of *L. pneumophila* in *D. discoideum*  
263 lacking MCS components with alterations of the LCVs. To this end, we quantified the LCV  
264 area in *D. discoideum* Ax3 and compared it to the LCVs in the  $\Delta vap$ ,  $\Delta osbG$ ,  $\Delta osbH$ ,  $\Delta osbK$   
265 or  $\Delta sey1$  mutants or to LCVs obtained in strain Ax3 upon production of GFP-Sac1\_ΔTMD  
266 (**Fig. 4A, Fig. S5A**).

267 Compared to LCVs in *D. discoideum* Ax3, LCVs in the  $\Delta vap$  strain were significantly  
268 smaller at 2 h and 8 h p.i., and larger at 16 h p.i. (**Fig. 4B**). Moreover, the LCVs were  
269 significantly smaller in the  $\Delta osbK$  mutant strain at 2 h, 8 h and 16 h p.i., larger in the  $\Delta osbH$   
270 mutant at 8 h and 16 h p.i. and did not change in the  $\Delta osbG$  mutant (**Fig. 4B**). Intriguingly, the  
271 LCVs in the  $\Delta osbK$  mutant strain were even smaller than in the  $\Delta sey1$  mutant used as a  
272 control [66]. The production of GFP-Sac1\_ΔTMD in *D. discoideum* Ax3 significantly  
273 reduced the LCV size at 2 h, 8 h and 16 h post infection compared to amoeba producing GFP-  
274 Sac1 or GFP-Sac1\_C383S (**Fig. 4B**). Upon production of GFP-Sac1\_ΔTMD in the  $\Delta vap$ ,  
275  $\Delta osbG$ ,  $\Delta osbH$ ,  $\Delta osbK$ , or  $\Delta sey1$  mutant strains the LCV size was also reduced at all time  
276 points p.i. compared to amoebae producing GFP-Sac1 (**Fig. S5B**). Taken together, reduced  
277 intracellular replication in some *D. discoideum* strains ( $\Delta vap$ ,  $\Delta osbK$ ,  $\Delta sey1$ , and  
278 Sac1\_ΔTMD) is positively correlated with a reduced LCV expansion, and increased  
279 intracellular replication in the  $\Delta osbH$  mutant is correlated with an enhanced LCV expansion.

280

281 **Sac1\_ΔTMD reduces the accumulation of PtdIns(4)P, Vap and OSBP8 on LCV-ER**  
282 **MCS**

283 We then sought to assess the effects of *D. discoideum* MCS components on the LCV  
284 PtdIns(4)P levels. To this end, we infected amoeba with either mCerulean- or mPlum-

285 producing *L. pneumophila* and analyzed PtdIns(4)*P* on LCVs by confocal microscopy and  
286 imaging flow cytometry (IFC) using dually labeled *D. discoideum* strains producing P4C-  
287 mCherry and either GFP-Sac1 (**Fig. 5AB, Fig. S6**) or GFP-Sac1\_ΔTMD (**Fig. 2A, Fig. 4A,**  
288 **Fig. 5B**, data not shown).

289 Compared to the ectopic production of GFP-Sac1, the production of GFP-Sac1\_ΔTMD in  
290 *D. discoideum* Ax3 resulted in a significant decrease of the IFC P4C colocalization score (see  
291 Materials and Methods) for the acquisition of P4C-mCherry on LCV-ER MCS (**Fig. 5B**).  
292 GFP-Sac1\_ΔTMD localized in strain Ax3 throughout the cell and does not appear to have an  
293 organelle preference (**Fig. 2A, Fig. 4A**). Accordingly, this result suggests that ectopic  
294 production of GFP-Sac1\_ΔTMD reduces the PtdIns(4)*P* levels on both the ER as well as the  
295 limiting LCV membrane, which cannot be discriminated due to the lower resolution of IFC  
296 compared to confocal microscopy. Similarly, the ectopic production of GFP-Sac1\_ΔTMD in  
297 the *D. discoideum* Δ*vap*, Δ*osbG*, Δ*osbH*, or Δ*osbK* mutant strains resulted in a decrease of  
298 PtdIns(4)*P* on LCV-ER MCS (**Fig. 5B**), while GFP-Sac1\_ΔTMD localized in the mutant  
299 strains throughout the cell (data not shown). At the same time the P4C colocalization score on  
300 LCV-ER MCS in the Δ*vap*, Δ*osbG*, Δ*osbH*, or Δ*osbK* mutant strains was similar among the  
301 mutants but overall higher than on LCVs in the Ax3 parental strain (**Fig. 5B**). These findings  
302 suggest that the depletion of a single MCS component suffices to increase the overall levels of  
303 PtdIns(4)*P* on LCV-ER MCS.

304 Upon production of GFP-Sac1 in the *D. discoideum* Δ*vap*, Δ*osbG*, Δ*osbH*, or Δ*osbK*  
305 mutant strains, the IFC Sac1 colocalization score was similar for all LCV-ER MCS (**Fig. 5C**).  
306 This result indicates that the localization of Sac1 to LCV-ER MCS is not dependent on Vap or  
307 the OSBPs tested. The Sac1 colocalization score was slightly (but not significantly) lower in  
308 the Δ*sey1* mutant strain, suggesting that Sey1 might play a role in the acquisition of Sac1 to  
309 LCV-ER MCS (**Fig. 5C**). This result is reflected in the finding that Sey1 promotes the

310 recruitment of ER to LCVs [66]. In summary, compared to the production of GFP-Sac1, the  
311 production of GFP-Sac1\_ΔTMD in *D. discoideum* Ax3 or the Δvap, ΔosbG, ΔosbH, ΔosbK or  
312 Δsey1 mutant strains decreased the PtdIns(4)P level on LCV-ER MCS, while Sac1 did not  
313 change, in agreement with the notion that GFP-Sac1\_ΔTMD globally reduces PtdIns(4)P  
314 levels.

315 We also assessed by confocal microscopy and IFC the effect of Sac1\_ΔTMD for the  
316 accumulation of Vap, OSBP7, OSBP8 or OSBP11 on LCVs (**Fig. 5DE, Fig. S7**). To this end,  
317 we used dually fluorescent labeled *D. discoideum* Ax3 producing either mCherry-Sac1 or  
318 mCherry-Sac1\_ΔTMD and GFP fusion proteins of Vap, OSBP7, OSBP8 or OSBP11.  
319 Compared to the ectopic production of mCherry-Sac1, the production of mCherry-  
320 Sac1\_ΔTMD in *D. discoideum* Ax3 resulted in a significant decrease of the IFC MCS  
321 component colocalization score for the acquisition on LCV-ER MCS of GFP fusions of Vap  
322 and OSBP8, but not OSBP7, OSBP11 or Sey1 (**Fig. 5E**). Taken together, compared to the  
323 production of mCherry-Sac1, the production of mCherry-Sac1\_ΔTMD in *D. discoideum* Ax3,  
324 decreased the levels of Vap and OSBP8 on LCV-ER MCS, suggesting that the localization of  
325 these MCS components is regulated by PtdIns(4)P levels on the LCVs.

326

### 327 **The *L. pneumophila* effectors LepB and SidC promote expansion of PtdIns(4)P-positive** 328 **LCVs**

329 To assess the role of *L. pneumophila* effector proteins for LCV remodeling and PtdIns(4)P  
330 levels, we analyzed LepB, a Rab1 GTPase activating protein (GAP)/PtdIns 4-kinase [20, 31]  
331 and SidC, a PtdIns(4)P interactor/ubiquitin ligase [17, 57, 74, 75]. To this end, we quantified  
332 the LCV area in *D. discoideum* Ax3 producing CnxA-GFP, GFP-Sac1 or GFP-Sac1\_ΔTMD,  
333 following an infection with mCerulean-producing *L. pneumophila* JR32, ΔlepB or ΔsidC (**Fig.**  
334 **6A, Fig. S8**).

335 In *D. discoideum* producing CnxA-GFP, LCVs harboring  $\Delta lepB$  or  $\Delta sidC$  mutant *L.*  
336 *pneumophila* were significantly smaller than LCVs harboring strain JR32 at 1 h, 2 h and 8 h  
337 p.i. (**Fig. 6B**). Overall, the LCVs were of similar size in *D. discoideum* producing GFP-Sac1,  
338 but significantly smaller in *D. discoideum* producing GFP-Sac1\_ΔTMD. In the latter case,  
339 LCVs harboring  $\Delta lepB$  or  $\Delta sidC$  mutant *L. pneumophila* were also significantly smaller than  
340 LCVs harboring strain JR32 at 1 h, 2 h and 8 h p.i. ( $\Delta lepB$ ) and at 1 h p.i. ( $\Delta sidC$ ).

341 In order to correlate the LCV area with the PtdIns(4)*P* levels on the pathogen  
342 compartment, we used IFC and *D. discoideum* strains producing in parallel P4C-mCherry and  
343 CnxA-GFP, GFP-Sac1 or GFP-Sac1\_ΔTMD, infected with mPlum-producing *L. pneumophila*  
344 JR32,  $\Delta lepB$  or  $\Delta sidC$  (**Fig. 6C**). In all cases, the IFC colocalization score for the acquisition  
345 of P4C-mCherry on LCVs decreased in the course of an infection (1-8 h p.i.). Compared to  
346 the parental strain JR32, the score was lowest for  $\Delta lepB$  and intermediate for  $\Delta sidC$ . The  
347 colocalization scores were similar in *D. discoideum* producing CnxA-GFP or GFP-Sac1, but  
348 significantly lower in *D. discoideum* producing GFP-Sac1\_ΔTMD. Taken together, the lack  
349 of the *L. pneumophila* Rab1 GAP/PtdIns 4-kinase LepB or the PtdIns(4)*P* interactor/ubiquitin  
350 ligase SidC causes a reduction in LCV area and PtdIns(4)*P* levels. These results indicate that  
351 the *L. pneumophila* effector proteins LepB and SidC play a role in the PtdIns(4)*P*-dependent  
352 LCV remodeling at LCV-ER MCS.

353

## 354 **Discussion**

355 In this study, we identified several *D. discoideum* MCS components localizing to LCVs (**Fig.**  
356 **1**). We then used dually fluorescence-labeled *D. discoideum* amoeba to visualize and quantify  
357 MCS components at the LCV-ER interface. The protein Vap localized to the PtdIns(4)*P*-  
358 positive LCV membrane as well as the ER, while OSBP8 and Sac1 exclusively localized to  
359 the ER, and OSBP11 was detected solely on the LCV membrane (**Fig. 2, Table 1**). The MCS

360 components were found to be implicated in intracellular growth of *L. pneumophila* (**Fig. 3**)  
361 and LCV remodeling (**Fig. 4**). Host and bacterial factors regulate the PtdIns(4)*P* levels on  
362 LCVs: a derivative of the PtdIns(4)*P* 4-phosphatase Sac1 lacking its membrane anchor,  
363 Sac1\_ΔTMD (**Fig. 5**), or the lack of the *L. pneumophila* PtdIns 4-kinase, LepB (**Fig. 6**),  
364 reduced the PtdIns(4)*P* score on LCVs. Taken together, these findings are compatible with the  
365 notion that a *Legionella*- and host cell-driven PtdIns(4)*P* gradient at LCV-ER MCSs promotes  
366 Vap-, Sac1- and OSBP-dependent pathogen vacuole remodeling (**Fig. 7**).

367 We quantified LCV size changes at early infection time points (1-2 h p.i.) to assess the role  
368 of MCS components in LCV remodeling (**Fig. 4, Fig. 6**). This approach revealed that Vap and  
369 even more pronouncedly OSBP11 promote LCV expansion. The size reduction of LCVs in *D.*  
370 *discoideum* Δ*vap* or Δ*osbK* mutant strains was relatively small: the LCVs in the mutant  
371 strains were ca. 2-2.5 μm<sup>2</sup>, compared to ca. 3 μm<sup>2</sup> in the Ax3 parental strain. Accordingly,  
372 these small LCV size changes likely reflect a structural remodeling of the pathogen vacuole  
373 rather than a substantial LCV expansion. MCS promote the non-vesicular exchange of lipids  
374 in mammalian cells [60], and “counter lipids” transported by OSBPs along a Sac1-dependent  
375 PtdIns(4)*P* gradient at ER MCS include phosphatidylserine [63, 64] and cholesterol [61, 65].  
376 The identification of the lipids exchanged by the LCV-ER PtdIns(4)*P* gradient and the  
377 specific OSBPs involved will be the subject of future studies.

378 A massive expansion of the pathogen vacuole at later infection time points (> 8 h p.i.) is  
379 required to accommodate intracellular replication of *L. pneumophila* and is likely promoted  
380 by vesicle fusion. Indeed, LCV formation implicates the interception of (anterograde and  
381 retrograde) vesicular trafficking between the ER and the Golgi apparatus [42-44], and nascent  
382 LCVs continuously capture and accumulate PtdIns(4)*P*-positive vesicles from the Golgi  
383 apparatus [49]. Further supporting the notion that ER-derived vesicles fuse with LCVs is the  
384 finding that the SNARE Sec22b, which promotes fusion of ER-derived vesicles with the *cis*-  
385 Golgi, is recruited to LCVs shortly after infection [45, 46]. The fusion requires the *L.*

386 *pneumophila* effector-mediated activation of Rab1 on LCVs and is mediated by the non-  
387 canonical pairing of the v-SNARE Sec22b on the vesicles with PM-derived t-SNAREs such  
388 as syntaxin2, -3, -4 and SNAP23 on the LCV [47, 48]. In agreement with this scenario,  
389 syntaxins (5, 7A/B, 8A/B, 18), t-SNAREs,  $\alpha$ - and  $\gamma$ -SNAP as well as Vti1A, Vamp7A/B and  
390 NsfA were identified on LCVs by proteomics (**Table S1**).

391 Moreover, several Icm/Dot-translocated *L. pneumophila* effector proteins were identified  
392 on LCVs by the comparative proteomics approach (**Table S1**). These effectors prominently  
393 include several PtdIns(4)*P*-binding *L. pneumophila* enzymes: the ubiquitin ligase SidC and its  
394 paralogue SdcA, the Rab1 GEF/AMPyase SidM/DrrA and the phytate-activated protein  
395 kinase Lpg2603. Furthermore, the deAMPyase and SidM antagonist SidD, as well as the  
396 retromer interactor RidL were identified on purified LCVs. To study the role of effector  
397 proteins for LCV remodeling and PtdIns(4)*P* levels, we analyzed the  $\Delta lepB$  and  $\Delta sidC$  mutant  
398 strains (**Fig. 6**). LCVs harboring these mutant strains were smaller and showed a reduced P4C  
399 score at LCV-ER MCS. Noteworthy, the effects were augmented in *D. discoideum* producing  
400 Sac1\_ΔTMD. These results are readily explicable for the PtdIns 4-kinase LepB: if this kinase  
401 is lacking, the PtdIns(4)*P* levels on LCVs are lower and LCV remodeling is impaired. The  
402 findings are more difficult to interpret for SidC. This effector localizes exclusively on LCVs  
403 in *L. pneumophila*-infected *D. discoideum* [54-57] and tightly binds PtdIns(4)*P* with a  
404 dissociation constant,  $K_d$ , in the range of 240 nM [76]. Hence, SidC might titrate PtdIns(4)*P*  
405 levels on LCVs, and its absence in *L. pneumophila* is expected to expose more PtdIns(4)*P* on  
406 the pathogen vacuole. Accordingly, the finding that LCVs harboring the  $\Delta sidC$  mutant strain  
407 show a lower P4C score is caused by more indirect features of the effector.

408 In addition to the ER-localizing PtdIns(4)*P* 4-phosphatase Sac1, other host cell factors  
409 involved in PtdIns(4)*P* turnover might play a role at LCV-ER MCS. The PM-derived PtdIns  
410 4-kinase III $\alpha$  (PI4KIII $\alpha$ ) [22] and trans-Golgi-derived PI4KIII $\beta$  [23] promote the membrane  
411 localization of PtdIns(4)*P*-binding effectors, and therefore, might modulate PtdIns(4)*P* levels



412 on LCVs. Moreover, while the PtdIns(4,5) $P_2$  5-phosphatase OCRL/Dd5P4 produces  
413 PtdIns(4) $P$  on LCVs, it restricts intracellular replication of *L. pneumophila* [24, 72],  
414 suggesting that this PI phosphatase exerts pleiotropic and complex functions in the context of  
415 LCV formation and intracellular bacterial replication.

416 The association of the LCV with ER in amoeba and macrophages represents a  
417 longstanding observation [51, 52], which is not understood on a molecular level. In particular,  
418 the identity of the tiny, periodic “hair-like” structures between the pathogen vacuole and the  
419 ER is unknown. On a similar note, the identity of possible (bacterial or host) tether proteins is  
420 not known. A possible candidate for a *L. pneumophila* tether protein is the Icm/Dot-secreted  
421 effector Ceg9. This effector might stabilize the LCV-ER contact sites by directly binding to  
422 the host protein Rtn4 [58].

423 Several intracellular bacterial pathogens hijack MCS components during infection [77].  
424 The mechanistically best characterized case is *Chlamydia trachomatis*, which forms a  
425 replication-permissive compartment termed inclusion [77]. Intriguingly, the *Chlamydia*  
426 integral membrane proteins IncV and IncD tether the inclusion to the ER [78]. While IncV  
427 directly binds Vap on the ER through a FFAT motif [79], IncD indirectly makes contact to  
428 Vap through the FFAT motif-containing host protein CERT (ceramide transfer protein) [80,  
429 81].

430 Taken together, this study has revealed the importance of host and bacterial factors for  
431 MCS formation, LCV remodeling and intracellular replication of *L. pneumophila*. The study  
432 paves the way for an in-depth functional and structural analysis of LCV-ER MCS, and future  
433 studies will identify possible *L. pneumophila* tethering factors, which promote and stabilize  
434 the LCV-ER MCS.

435

## 436 **Materials and Methods**

### 437 **Molecular cloning**

438 All plasmids constructed and used are listed in the Supplementary Information (**Table S2**).  
439 Cloning was performed using standard protocols, plasmids were isolated by using  
440 commercially available kits from Macherey-Nagel, DNA fragments were amplified using  
441 Phusion High Fidelity DNA polymerase. For Gibson assembly, the NEBuilder HiFi DNA  
442 assembly kit was used. All constructs were verified by DNA sequencing.

443 To construct the knockout vectors for *vap*, *osbG*, and *osbK* (**Table S2**), the corresponding  
444 5' fragments were amplified from *D. discoideum* genomic DNA with specific primer pairs  
445 oL1277/oL1278, oL1256/oL1356, or oL1687/oL1688, respectively, and cloned into the  
446 pBlueScript vector (Stratagene, La Jolla, CA). The 3' fragments were identically produced  
447 using the matching primer pairs, oL1279/oL1280, oL1358/oL1359, or oL1693/oL1694,  
448 respectively and cloned into pBlueScript containing the 5' fragment. After plasmid sequence  
449 verification, the blasticidin resistance cassette was inserted between the two 5' and 3'  
450 fragments. The final knockout vectors were digested with KpnI and NotI restriction enzymes  
451 before electroporation into Ax3 cells. Blasticidin selection (10 µg/ml) was applied 24 h after  
452 transfection. Individual colonies were tested by PCR to confirm gene replacement (**Fig. S3**).  
453 The knockout vectors for *osbH* (#629), a kind gift of Prof. Markus Maniak (University of  
454 Kassel, Germany), was digested by SpeI and SphI before transfection of Ax3 cells, and  
455 transfectants were selected as described above.

456 The *lepB* deletion strain (IH03) was generated essentially as described [83] by double  
457 homologous recombination allelic exchange using counter-selection on sucrose (Suc). The 3'  
458 and 5' flanking regions of *lepB* (*lpg2490*) were amplified by PCR using the primer pairs  
459 oIH011/oIH013 and oIH012/oIH014, respectively, and genomic *L. pneumophila* DNA as a  
460 template. The flanking regions, the Kan<sup>R</sup> cassette and the pLAW344 backbone cut with the  
461 appropriate restriction enzymes were assembled using a four-way ligation, yielding the  
462 suicide plasmid pIH29. *L. pneumophila* JR32 was transformed by electroporation with pIH29,  
463 and co-integration of the plasmid was assayed by selection on CYE/Km (5-7 days, 30°C).

464 Several clones thus obtained were picked and re-streaked on CYE/Km, grown overnight in  
465 AYE medium (96-well plates, 180 rpm) and streaked on CYE/Km/2% Suc. After 3-5 days at  
466 37°C, single colonies were spotted on CYE/Cm, CYE/Km/2% Suc and CYE/Km plates to  
467 screen for Cm<sup>S</sup>, Km<sup>R</sup>, Suc<sup>R</sup> colonies. Double-cross-over events (deletion mutants) were  
468 confirmed by PCR screening and sequencing.

469 The constructs pMIB39 (*gfp-osbK*), pMIB41 (*gfp-vap*), pMIB87 (*gfp-osbG*), and pMIB89  
470 (*osbH-gfp*) were constructed by PCR amplification using the primers oMIB38/oMIB39,  
471 oMIB14/oMIB12, oMIB20/oMIB18 or oMIB21/oMIB22 and cloned into plasmid pDM317  
472 (*osbK*, *vap*, *osbG*) or pDM323 (*osbH*) after digestion with XhoI/SpeI (*osbK*), BamHI/SpeI  
473 (*vap*) or BglII/SpeI (*osbG*, *osbH*).

474 A GFP-Sac1 fusion was constructed by PCR amplification of the putative open reading  
475 frame using *D. discoideum* genomic DNA and the primers oLS039 and oLS040 respectively.  
476 The DNA fragment was cloned into BglII and SpeI sites of pDM317, yielding pLS037 (GFP-  
477 Sac1). The GFP-Sac1 catalytically inactive mutant (Sac1\_C383S) was obtained exchanging  
478 the codon TGT (cysteine) in position 383 to AGC coding for serine. Nucleotide substitution  
479 was carried out by site-directed mutagenesis according to the manufacturer's recommendation  
480 (QuickChange, Agilent) using pLS037 as template and the PAGE purified primers oSV159  
481 and oSV161 yielding pSV015 (GFP-Sac1\_C383S). The truncated GFP-Sac1\_ΔTMD was  
482 obtained by deletion of the transmembrane domain of the *D. discoideum sac1* gene. To this  
483 end, pLS037 excluding the transmembrane domain was amplified with the primers oSV227  
484 and oSV228 yielding pSV034. The plasmids pSV044 and pSV045 harboring Sac1 or  
485 Sac1\_ΔTMD fused to mCherry were constructed by cloning the genes into BglII and SpeI  
486 sites of pDM1042. pLS037 and pSV034 were used as templates.

487

488 **Bacteria, cells, growth conditions, and transformation**

489 Bacterial strains and cell lines used are listed in **Table S2**. *L. pneumophila* strains were grown  
490 3 days on charcoal yeast extract (CYE) agar plates, buffered with *N*-(2-acetamido)-2-  
491 aminoethane sulfonic acid (ACES) at 37°C. Liquid cultures in ACES yeast extract (AYE)  
492 medium were inoculated at an OD<sub>600</sub> of 0.1 and grown at 37°C for 21 h to an early stationary  
493 phase ( $2 \times 10^9$  bacteria/ml). Chloramphenicol (5 µg/ml) was added as required.

494 *D. discoideum* stains were grown at 23°C in HL5 medium (ForMedium). Transformation  
495 of axenic *D. discoideum* amoeba were performed as described [18, 82]. Blasticidin (10  
496 µg/mL), geneticin (G418, 20 µg/ml) and hygromycin (50 µg/ml) were appropriately added.

497 Murine macrophage-like RAW 264.7 cells and human A549 lung epithelial carcinoma  
498 cells were cultivated in RPMI 1640 medium (Life Technologies) supplemented with 10%  
499 heat-inactivated fetal bovine serum (FBS: Life Technologies) and 1% glutamine (Life  
500 Technologies). The cells were incubated at 37°C with 5% CO<sub>2</sub> in a humidified atmosphere.

501

### 502 **Intracellular replication of *Legionella pneumophila***

503 Intracellular growth of *L. pneumophila* JR32 and  $\Delta icmT$  in different *D. discoideum* strains  
504 was assessed by measuring fluorescence increase during intracellular replication of mCherry-  
505 producing *Legionella* strains (relative fluorescence units, RFU) and by determining colony-  
506 forming units (CFU).

507 To determine intracellular replication of mCherry-producing *L. pneumophila*, *D.*  
508 *discoideum* amoebae were seeded ( $2 \times 10^4$  cells) in 96-well culture-treated plates (Thermo  
509 Fisher) and cultured in HL-5 medium at 23°C. The cells were infected (MOI 1) with the *L.*  
510 *pneumophila* strains JR32 or  $\Delta icmT$  harboring plasmid pNP102. After 21 h growth in AYE  
511 medium, the bacteria were diluted in MB medium, centrifuged ( $450 \times g$ , 10 min, RT), and  
512 incubated for 1 h at 25°C (well plate was kept moist with water in extra wells). Subsequently,  
513 infected cells were washed three times with MB medium, incubated for the time indicated at

514 25°C, and mCherry fluorescence was measured every 2 days using a microtiter plate reader  
515 (Synergy H1, Biotek).

516 To assess CFUs, *D. discoideum* amoebae were infected (MOI 1) with mCherry-producing  
517 *L. pneumophila* JR32 or  $\Delta icmT$  grown for 21 h, diluted in MB medium, centrifuged and  
518 incubated for 1 h at 25°C. The infected cells were washed three times with MB medium and  
519 incubated for the time indicated at 25°C. The infected amoebae were lysed for 10 min with  
520 0.8% saponin (47036, Sigma-Aldrich). Subsequently, serial dilutions were plated every 2 days  
521 on CYE agar plated containing Cam (5 µg/ml) and incubated for 3 days at 37°C. CFUs were  
522 counted using an automated colony counter (CounterMat Flash 4000, IUL Instruments,  
523 CounterMat software) and the number of CFUs (per ml) was calculated.

524 To test if members of the OSBP family affect intracellular replication of *L. pneumophila* in  
525 murine RAW 264.7 macrophages, the steroidal saponin OSBP inhibitor OSW-1 (CAY-30310,  
526 Cayman) was added at different concentrations. The macrophages were detached diluted with  
527 pre-warmed supplemented RPMI to a concentration of  $2.5 \times 10^4$  cells/140 µL medium and  
528 grown for 24 h in 96-well plates. Liquid cultures of GFP-producing *L. pneumophila* JR32  
529 (pNT28) were grown for 21 h and diluted in pre-warmed supplemented RPMI to a  
530 concentration of  $5 \times 10^4$  cells/50 µL medium. A 10 µM OSW-1 stock solution was prepared  
531 freshly. Bacterial suspensions, the OSW-1 working solution (final concentration 5, 20 or 100  
532 nM) and sterile DPBS were added to wells, yielding an MOI 1. The infection was  
533 synchronized by centrifugation ( $450 \times g$ , 10 min.). Plates were incubated at 37°C and 5 %  
534 CO<sub>2</sub> in a humidified atmosphere. At the indicated time points (12, 24, 36, 48, 60 h p.i.)  
535 intracellular replication was assessed by measuring bacterial GFP production with a plate  
536 reader.

537

538 **RNA interference, determination of proteins depletion efficiency and cytotoxicity**

539 RNA interference experiments were performed as described [59]. Briefly, A549 cells were  
540 treated for 48 h with siRNA oligonucleotides with a final concentration of 10 nM in a 96-well  
541 plate (RFU) or 24-well plate (toxicity, Western blot) (**Table S3**). The diluted siRNA was  
542 added to the wells (5-10 min) at room temperature (RT), and diluted cells (96-well:  $2 \times 10^4$ ,  
543 24-well:  $6 \times 10^4$ ) in RPMI medium with FBS was added on top (48 h). Subsequently, the cells  
544 were infected (MOI 10) with GFP-producing *L. pneumophila* strains (pNT28), centrifuged  
545 and incubated for 1 h at 37°C with 5% CO<sub>2</sub>, washed three times and incubated for 24 h. GFP  
546 fluorescence was measured as described above at 1 h and 24 h post-infection.

547 Protein depletion efficiency was assessed as follows: cells were harvested in ice-cold PBS  
548 and lysed with ice-cold NP-40 cell lysis buffer. Cell extracts were subjected to SDS PAGE.  
549 After Western blotting, PVDF membranes were blocked with PBS/5% bovine serum albumin  
550 (BSA; Sigma-Aldrich) for 1 h at RT. Subsequently, specific primary antibodies against  
551 SacM1L (13033-1-AP, Proteintech) or GAPDH (2118, Cell Signaling) were diluted 1:500 -  
552 1:1,000 in blocking buffer and used to stain the indicated proteins (4°C, overnight). Finally,  
553 horse radish peroxidase (HRP)-conjugated secondary antibodies (GE Healthcare Life  
554 Sciences) were diluted 1:2,000 in blocking buffer and incubated (1 h, RT). After extensive  
555 washing, the enhanced chemiluminescence (ECL) signal was detected with an ImageQuant  
556 LAS4000 (GE Healthcare Life Sciences).

557 To assess cell viability after siRNA treatment, the Zombie Aqua fixable viability kit  
558 (BioLegend) was used. A549 cells were grown and treated with siRNA oligonucleotides  
559 (**Table S3**) as described above (protein depletion efficiency). Cells treated for 1 h with 70%  
560 sterile-filtered ethanol (EtOH) served as positive control for cell death. The cells were then  
561 harvested in ice-cold PBS and stained for 30 min in the dark with 50 µl Zombie Aqua dye  
562 1:500 diluted in PBS. Cells were washed once with supplemented RPMI, centrifuged, washed  
563 once with PBS, centrifuged and fixed with 4 % paraformaldehyd (PFA) for 30 min at RT.  
564 After centrifugation cells were resuspended in 500 µl PBS. Subsequently, cells were subjected

565 to flow cytometry analysis (BD FACS Canto II). Gates were set according to  
566 forward/sideward scatter properties, and 10,000 events were collected for each sample. Mean  
567 and standard error of mean (SEM) of Zombie-positive cells are shown.

568

#### 569 **Confocal fluorescence microscopy of infected *D. discoideum***

570 Dually fluorescence labeled *D. discoideum* strains were infected, fixed and imaged by  
571 confocal fluorescence microscopy. Prior to infection, exponential phase *D. discoideum*  
572 amoebae were seeded ( $1 \times 10^5$  cells per well) in HL5 medium containing geneticin (G418,  
573 20  $\mu\text{g/ml}$ ) and hygromycin (50  $\mu\text{g/ml}$ ) in culture treated 6-well plates (VWR) and cultured  
574 overnight at 23°C. Cells were infected (MOI 5) with mCerulean-producing *L. pneumophila*  
575 JR32 (pNP99), centrifuged ( $450 \times g$ , 10 min, RT) and incubated at 25°C for 1 h.  
576 Subsequently, infected cells were washed three times with HL5 medium and incubated at  
577 25°C for the time indicated. At given time points, infected cells (including supernatant) were  
578 collected from the 6-wells plate, centrifuged ( $500 \times g$ , 5 min, RT) and fixed with 4% PFA  
579 (Electron Microscopy Sciences) for 30 min at RT. Following fixation, the cells were washed  
580 twice with PBS, transferred to a 16-wells  $\mu$ -slide dish (Ibidi) and immobilized by adding a  
581 layer of PBS/0.5% agarose.

582 Image acquisition was performed using the confocal microscope Leica TCS SP8 X CLSM  
583 (HC PL APO CS2, objective 63 $\times$ /1.4–0.60 oil; Leica Microsystems) with a scanning speed of  
584 200 Hz, bi-directional laser scan. Pictures were acquired with a pixel/voxel size close to the  
585 instrument's Nyquist criterion of  $43 \times 43 \times 130$  nm (xyz). Images were deconvolved with  
586 Huygens professional version 19.10 software (Scientific Volume Imaging, <http://svi.nl>) using  
587 the CMLE algorithm, set to 10-20 iterations and quality threshold of 0.05.

588

#### 589 **Imaging flow cytometry of infected *D. discoideum***

590 Processing of infected *D. discoideum* for IFC was performed as described [84, 85]. *D.*  
591 *discoideum* cells harboring the plasmids indicated were seeded in a 12-well plate containing  
592 HL5 medium, geneticin and hygromycin, and infected (MOI 5) with mPlum-producing *L.*  
593 *pneumophila* JR32,  $\Delta lepB$  or  $\Delta sidC$  (pAW014). The infection was synchronized by  
594 centrifugation ( $450 \times g$ , 10 min, RT). The cells were incubated for 1 h at 25°C, washed three  
595 times with HL5 and incubated at 25°C. At the indicates time points cells were collected,  
596 centrifuged ( $450 \times g$ , 5 min, RT) and fixed in 2 % PFA for 90 min on ice. Fixed infected  
597 amoebae were washed twice in phosphate-buffered saline (PBS) and resuspended in 20  $\mu$ l ice  
598 cold PBS prior to IFC analysis.

599 At least 5000 cells were acquired using an imaging flow cytometer (ImageStramX MkII;  
600 Amnis) and analyzed with the IDEAS (v6.2) software (Amnis). Infected amoeba containing  
601 one intracellular *L. pneumophila* bacterium were gated and assessed for colocalization of GFP  
602 and mCherry (host) with mPlum produced by the bacteria. The software computes the IFC  
603 colocalization score (bright detail similarity), which is the log-transformed Pearson's  
604 correlation coefficient of the localized bright spots with a radius of 3 pixels or less in two  
605 images and is used to quantify relative enrichment of a marker on the LCV. Data analysis was  
606 performed using GraphPad Prism.

607

### 608 **Comparative proteomics of purified LCVs**

609 LCVs from *D. discoideum* amoebae were purified basically as described [86]. Briefly, *D.*  
610 *discoideum* Ax3 or  $\Delta sey1$  producing CnxA-GFP (pAW016) was seeded in T75 flasks (3 per  
611 sample) one day before the experiment to reach 80% confluency. The amoebae were infected  
612 (MOI 50, 1 h) with *L. pneumophila* JR32 producing mCherry (pNP102) grown to stationary  
613 phase (21 h liquid culture). Subsequently, the cells were washed with SorC buffer and scraped  
614 in homogenization buffer (20 mM HEPES, 250 mM sucrose, 0.5 mM EGTA, pH 7.2) [45].  
615 Cells were homogenized using a ball homogenizer (Isobiotec) with an exclusion size of 8  $\mu$ m



616 and incubated with an anti-SidC antibody followed by a secondary anti-rabbit antibody  
617 coupled to magnetic beads. The LCVs were separated in a magnetic field and further purified  
618 by a density gradient centrifugation step as described [87]. Three independent biological  
619 samples were prepared each for LCVs purified from *L. pneumophila*-infected *D. discoideum*  
620 Ax3 or  $\Delta$ *sey1*.

621 LCVs purified by immuno-magnetic separation and density gradient centrifugation  
622 (fraction 4) were resolved by 1D-SDS-PAGE, the gel lanes were excised in ten equidistant  
623 pieces and subjected to trypsin digestion [88]. For the subsequent LC-MS/MS measurements,  
624 the digests were separated by reversed phase column chromatography using an EASY nLC  
625 1000 (Thermo Fisher Scientific) with self-packed columns (OD 360  $\mu$ m, ID 100  $\mu$ m, length  
626 20 cm) filled with 3  $\mu$ m diameter C18 particles (Dr. Maisch, Ammerbuch-Entringen,  
627 Germany) in a one-column setup. Following loading/ desalting in 0.1% acetic acid in water,  
628 the peptides were separated by applying a binary non-linear gradient from 5-53% acetonitrile  
629 in 0.1% acetic acid over 82 min. The LC was coupled online to a LTQ Orbitrap Elite mass  
630 spectrometer (Thermo Fisher, Bremen, Germany) with a spray voltage of 2.5 kV. After a  
631 survey scan in the Orbitrap ( $r = 60,000$ ), MS/MS data were recorded for the twenty most  
632 intensive precursor ions in the linear ion trap. Singly charged ions were not considered for  
633 MS/MS analysis. The lock mass option was enabled throughout all analyzes.

634 After mass spectrometric measurement, database search against a database of  
635 *Dictyostelium discoideum* and *Legionella pneumophila* Philadelphia downloaded Uniprot on  
636 14/10/2019 (25,478 and 3,024 entries, respectively) as well as label-free quantification (LFQ)  
637 was performed using MaxQuant (version 1.6.7.0) (Cox, J and Mann, M (2008). MaxQuant  
638 enables high peptide identification rates, individualized p.p.b.-range mass accuracies and  
639 proteome-wide protein quantification. Nature Biotechnology 26, 1367–72). Common  
640 laboratory contaminants and reversed sequences were included by MaxQuant. Search  
641 parameters were set as follows: trypsin/P specific digestion with up to two missed cleavages,

642 methionine oxidation and N-terminal acetylation as variable modification, match between  
643 runs with default parameters enabled. The FDRs (false discovery rates) of protein and PSM  
644 (peptide spectrum match) levels were set to 0.01. Two identified unique peptides were  
645 required for protein identification. LFQ was performed using the following settings: LFQ  
646 minimum ratio count 2 considering only unique for quantification.

647 Results were filtered for proteins quantified in at least two out of three biological replicates  
648 before statistical analysis. Here, two conditions were compared by a student's t-test applying a  
649 threshold p-value of 0.01, which was based on all possible permutations. Proteins were  
650 considered to be differentially abundant if the log<sub>2</sub>-fold change was greater than |0.8|. "ON/OFF proteins" were defined as being identified in all bioreplicates of one strain whereas  
651 the protein was not identified in any replicate of the other strain.  
652

653

#### 654 **Statistical methods**

655 Microscopy data analysis was performed using GraphPad Prism. The two-sample Student's t-  
656 test (Mann-Whitney test, no assumption of Gaussian distributions) was used. Probability  
657 values of less than 0.05, 0.01, and 0.001 were used to show statistically significant differences  
658 and are represented with \*, \*\*, or \*\*\*, respectively. The value of "n" represents the number  
659 of independent experiments performed or the number of analyzed cells per conditions (**Fig.**  
660 **4B, Fig. 6B**). For the comparative proteomics, the summarized protein expression values were  
661 used for statistical testing of between condition differentially abundant proteins. Empirical  
662 Bayes moderated t-tests were applied, as implemented in the R/Bioconductor limma package.

663

#### 664 **Data Availability**

665 The MS proteomics data discussed in this publication have been deposited to the  
666 ProteomeXchange Consortium via the PRIDE [89] partner repository with the dataset

667 identifier PXD034490 (Reviewer account details: Username,  
668 reviewer\_pxd034490@ebi.ac.uk; Password, JrGWYYBQ).

669

## 670 **Acknowledgements**

671 We would like to thank Markus Maniak for providing the deletion construct for *osbH*, Leoni  
672 Swart, Xiaoli Ma, Deise Schäfer, and Iris Hube for help with cloning, and Sebastian Grund  
673 for technical support with the preparation of MS samples. Work in the group of H.H. was  
674 supported by the Swiss National Science Foundation (SNF; 31003A\_175557,  
675 310030\_207826). Work in the group of D.B. was supported by the Federal Ministry of  
676 Education and Research (BMBF; grant 031A410B). Work in the group of C.B. was supported  
677 by the DFG and the SFB944 (grant SFB 944/3-P25). Work in the group of F.L. was supported  
678 by the Région Occitanie, the Centre National de la Recherche Scientifique (CNRS) and the  
679 University of Montpellier (UM). The authors declare no conflict of interest.

680

## 681 **References**

- 682 1. Newton HJ, Ang DK, van Driel IR, Hartland EL. Molecular pathogenesis of infections  
683 caused by *Legionella pneumophila*. Clin Microbiol Rev. 2010;23(2):274-98.
- 684 2. Mondino S, Schmidt S, Rolando M, Escoll P, Gomez-Valero L, Buchrieser C.  
685 Legionnaires' disease: State of the art knowledge of pathogenesis mechanisms of  
686 *Legionella*. Ann Rev Pathol. 2020;15:439-66.
- 687 3. Hoffmann C, Harrison CF, Hilbi H. The natural alternative: protozoa as cellular models  
688 for *Legionella* infection. Cell Microbiol. 2014;16:15-26.
- 689 4. Boamah DK, Zhou G, Ensminger AW, O'Connor TJ. From many hosts, one accidental  
690 pathogen: The diverse protozoan hosts of *Legionella*. Front Cell Infect Microbiol.  
691 2017;7:477.

- 692 5. Swart AL, Harrison CF, Eichinger L, Steinert M, Hilbi H. *Acanthamoeba* and  
693 *Dictyostelium* as cellular models for *Legionella* infection. *Front Cell Infect Microbiol.*  
694 2018;8:61.
- 695 6. Hilbi H, Buchrieser C. Microbe profile: *Legionella pneumophila* - a copycat eukaryote.  
696 *Microbiology.* 2022;168. doi: 10.1099/mic.0.001142.
- 697 7. Qiu J, Luo ZQ. *Legionella* and *Coxiella* effectors: strength in diversity and activity. *Nat*  
698 *Rev Microbiol.* 2017;15:591-605.
- 699 8. Finsel I, Hilbi H. Formation of a pathogen vacuole according to *Legionella pneumophila*:  
700 how to kill one bird with many stones. *Cell Microbiol.* 2015;17:935-50.
- 701 9. Escoll P, Mondino S, Rolando M, Buchrieser C. Targeting of host organelles by  
702 pathogenic bacteria: a sophisticated subversion strategy. *Nat Rev Microbiol.* 2016;14:5-  
703 19.
- 704 10. Personnic N, Bärlocher K, Finsel I, Hilbi H. Subversion of retrograde trafficking by  
705 translocated pathogen effectors. *Trends Microbiol.* 2016;24:450-62.
- 706 11. Bärlocher K, Welin A, Hilbi H. Formation of the *Legionella* replicative compartment at  
707 the crossroads of retrograde trafficking. *Front Cell Infect Microbiol.* 2017;7:482.
- 708 12. Swart AL, Gomez-Valero L, Buchrieser C, Hilbi H. Evolution and function of bacterial  
709 RCC1 repeat effectors. *Cell Microbiol.* 2020;22:e13246.
- 710 13. Asrat S, de Jesus DA, Hempstead AD, Ramabhadran V, Isberg RR. Bacterial pathogen  
711 manipulation of host membrane trafficking. *Ann Rev Cell Dev Biol.* 2014;30:79-109.
- 712 14. Sherwood RK, Roy CR. Autophagy evasion and endoplasmic reticulum subversion: The  
713 Yin and Yang of *Legionella* intracellular infection. *Ann Rev Microbiol.* 2016;70:413-33.
- 714 15. Steiner B, Weber S, Hilbi H. Formation of the *Legionella*-containing vacuole:  
715 phosphoinositide conversion, GTPase modulation and ER dynamics. *Int J Med*  
716 *Microbiol.* 2018;308:49-57.

- 717 16. Swart AL, Hilbi H. Phosphoinositides and the fate of *Legionella* in phagocytes. Front  
718 Immunol. 2020;11:25.
- 719 17. Weber SS, Ragaz C, Reus K, Nyfeler Y, Hilbi H. *Legionella pneumophila* exploits  
720 PI(4)P to anchor secreted effector proteins to the replicative vacuole. PLoS Pathog.  
721 2006;2(5):e46.
- 722 18. Weber S, Wagner M, Hilbi H. Live-cell imaging of phosphoinositide dynamics and  
723 membrane architecture during *Legionella* infection. mBio. 2014;5:e00839-13.
- 724 19. Li G, Liu H, Luo ZQ, Qiu J. Modulation of phagosome phosphoinositide dynamics by a  
725 *Legionella* phosphoinositide 3-kinase. EMBO Rep. 2021;22:e51163.
- 726 20. Dong N, Niu M, Hu L, Yao Q, Zhou R, Shao F. Modulation of membrane  
727 phosphoinositide dynamics by the phosphatidylinositide 4-kinase activity of the  
728 *Legionella* LepB effector. Nat Microbiol. 2016;2:16236.
- 729 21. Hsu F, Zhu W, Brennan L, Tao L, Luo ZQ, Mao Y. Structural basis for substrate  
730 recognition by a unique *Legionella* phosphoinositide phosphatase. Proc Natl Acad Sci U  
731 S A. 2012;109:13567-72.
- 732 22. Hubber A, Arasaki K, Nakatsu F, Hardiman C, Lambright D, De Camilli P, et al. The  
733 machinery at endoplasmic reticulum-plasma membrane contact sites contributes to spatial  
734 regulation of multiple *Legionella* effector proteins. PLoS Pathog. 2014;10:e1004222.
- 735 23. Brombacher E, Urwyler S, Ragaz C, Weber SS, Kami K, Overduin M, et al. Rab1  
736 guanine nucleotide exchange factor SidM is a major phosphatidylinositol 4-phosphate-  
737 binding effector protein of *Legionella pneumophila*. J Biol Chem. 2009;284:4846-56.
- 738 24. Weber SS, Ragaz C, Hilbi H. The inositol polyphosphate 5-phosphatase OCRL1 restricts  
739 intracellular growth of *Legionella*, localizes to the replicative vacuole and binds to the  
740 bacterial effector LpnE. Cell Microbiol. 2009;11:442-60.

- 741 25. Schoebel S, Blankenfeldt W, Goody RS, Itzen A. High-affinity binding of  
742 phosphatidylinositol 4-phosphate by *Legionella pneumophila* DrrA. EMBO Rep.  
743 2010;11:598-604.
- 744 26. Del Campo CM, Mishra AK, Wang YH, Roy CR, Janmey PA, Lambright DG. Structural  
745 basis for PI(4)P-specific membrane recruitment of the *Legionella pneumophila* effector  
746 DrrA/SidM. Structure. 2014;22:397-408.
- 747 27. Hammond GR, Machner MP, Balla T. A novel probe for phosphatidylinositol 4-  
748 phosphate reveals multiple pools beyond the Golgi. J Cell Biol. 2014;205:113-26.
- 749 28. Machner MP, Isberg RR. Targeting of host Rab GTPase function by the intravacuolar  
750 pathogen *Legionella pneumophila*. Dev Cell. 2006;11:47-56.
- 751 29. Murata T, Delprato A, Ingmundson A, Toomre DK, Lambright DG, Roy CR. The  
752 *Legionella pneumophila* effector protein DrrA is a Rab1 guanine nucleotide-exchange  
753 factor. Nat Cell Biol. 2006;8:971-7.
- 754 30. Machner MP, Isberg RR. A bifunctional bacterial protein links GDI displacement to  
755 Rab1 activation. Science. 2007;318:974-7.
- 756 31. Ingmundson A, Delprato A, Lambright DG, Roy CR. *Legionella pneumophila* proteins  
757 that regulate Rab1 membrane cycling. Nature. 2007;450:365-9.
- 758 32. Suh HY, Lee DW, Lee KH, Ku B, Choi SJ, Woo JS, et al. Structural insights into the dual  
759 nucleotide exchange and GDI displacement activity of SidM/DrrA. EMBO J.  
760 2010;29:496-504.
- 761 33. Zhu Y, Hu L, Zhou Y, Yao Q, Liu L, Shao F. Structural mechanism of host Rab1  
762 activation by the bifunctional *Legionella* type IV effector SidM/DrrA. Proc Natl Acad Sci  
763 U S A. 2010;107:4699-704.
- 764 34. Oesterlin LK, Goody RS, Itzen A. Posttranslational modifications of Rab proteins cause  
765 effective displacement of GDP dissociation inhibitor. Proc Natl Acad Sci U S A.  
766 2012;109:5621-6.

- 767 35. Müller MP, Peters H, Blümer J, Blankenfeldt W, Goody RS, Itzen A. The *Legionella*  
768 effector protein DrrA AMPylates the membrane traffic regulator Rab1b. *Science*.  
769 2010;329:946-9.
- 770 36. Hardiman CA, Roy CR. AMPylation is critical for Rab1 localization to vacuoles  
771 containing *Legionella pneumophila*. *mBio*. 2014;5:e01035-13.
- 772 37. Neunuebel MR, Chen Y, Gaspar AH, Backlund PS, Jr., Yergey A, Machner MP. De-  
773 AMPylation of the small GTPase Rab1 by the pathogen *Legionella pneumophila*.  
774 *Science*. 2011;333:453-6.
- 775 38. Tan Y, Luo ZQ. *Legionella pneumophila* SidD is a deAMPyase that modifies Rab1.  
776 *Nature*. 2011;475:506-9.
- 777 39. Mukherjee S, Liu X, Arasaki K, McDonough J, Galan JE, Roy CR. Modulation of Rab  
778 GTPase function by a protein phosphocholine transferase. *Nature*. 2011;477:103-6.
- 779 40. Tan Y, Arnold RJ, Luo ZQ. *Legionella pneumophila* regulates the small GTPase Rab1  
780 activity by reversible phosphorylcholine. *Proc Natl Acad Sci U S A*. 2011;108:21212-  
781 7.
- 782 41. Campanacci V, Mukherjee S, Roy CR, Cherfils J. Structure of the *Legionella* effector  
783 AnkX reveals the mechanism of phosphocholine transfer by the FIC domain. *EMBO J*.  
784 2013;32:1469-77.
- 785 42. Nagai H, Kagan JC, Zhu X, Kahn RA, Roy CR. A bacterial guanine nucleotide exchange  
786 factor activates ARF on *Legionella* phagosomes. *Science*. 2002;295:679-82.
- 787 43. Kagan JC, Roy CR. *Legionella* phagosomes intercept vesicular traffic from endoplasmic  
788 reticulum exit sites. *Nat Cell Biol*. 2002;4:945-54.
- 789 44. Robinson CG, Roy CR. Attachment and fusion of endoplasmic reticulum with vacuoles  
790 containing *Legionella pneumophila*. *Cell Microbiol*. 2006;8:793-805.
- 791 45. Derre I, Isberg RR. *Legionella pneumophila* replication vacuole formation involves rapid  
792 recruitment of proteins of the early secretory system. *Infect Immun*. 2004;72:3048-53.

- 793 46. Kagan JC, Stein MP, Pypaert M, Roy CR. *Legionella* subvert the functions of rab1 and  
794 sec22b to create a replicative organelle. *J Exp Med*. 2004;199:1201-11.
- 795 47. Arasaki K, Roy CR. *Legionella pneumophila* promotes functional interactions between  
796 plasma membrane syntaxins and Sec22b. *Traffic*. 2010;11:587-600.
- 797 48. Arasaki K, Toomre DK, Roy CR. The *Legionella pneumophila* effector DrrA is sufficient  
798 to stimulate SNARE-dependent membrane fusion. *Cell Host Microbe*. 2012;11:46-57.
- 799 49. Weber S, Steiner B, Welin A, Hilbi H. *Legionella*-containing vacuoles capture  
800 PtdIns(4)P-rich vesicles derived from the Golgi apparatus. *mBio*. 2018;9:e02420-18.
- 801 50. Kawabata M, Matsuo H, Koito T, Murata M, Kubori T, Nagai H, et al. *Legionella* hijacks  
802 the host Golgi-to-ER retrograde pathway for the association of Legionella-containing  
803 vacuole with the ER. *PLoS Pathog*. 2021;17:e1009437.
- 804 51. Swanson MS, Isberg RR. Association of *Legionella pneumophila* with the macrophage  
805 endoplasmic reticulum. *Infect Immun*. 1995;63:3609-20.
- 806 52. Abu Kwaik Y. The phagosome containing *Legionella pneumophila* within the protozoan  
807 *Hartmannella vermiformis* is surrounded by the rough endoplasmic reticulum. *Appl*  
808 *Environ Microbiol*. 1996;62:2022-8.
- 809 53. Tilney LG, Harb OS, Connelly PS, Robinson CG, Roy CR. How the parasitic bacterium  
810 *Legionella pneumophila* modifies its phagosome and transforms it into rough ER:  
811 implications for conversion of plasma membrane to the ER membrane. *J Cell Sci*.  
812 2001;114:4637-50.
- 813 54. Urwyler S, Nyfeler Y, Ragaz C, Lee H, Mueller LN, Aebersold R, et al. Proteome  
814 analysis of *Legionella* vacuoles purified by magnetic immunoseparation reveals secretory  
815 and endosomal GTPases. *Traffic*. 2009;10:76-87.
- 816 55. Hoffmann C, Finsel I, Otto A, Pfaffinger G, Rothmeier E, Hecker M, et al. Functional  
817 analysis of novel Rab GTPases identified in the proteome of purified *Legionella*-  
818 containing vacuoles from macrophages. *Cell Microbiol*. 2014;16:1034-52.



- 819 56. Schmölders J, Manske C, Otto A, Hoffmann C, Steiner B, Welin A, et al. Comparative  
820 proteomics of purified pathogen vacuoles correlates intracellular replication of *Legionella*  
821 *pneumophila* with the small GTPase Ras-related protein 1 (Rap1). *Mol Cell Proteomics*.  
822 2017;16:622-41.
- 823 57. Ragaz C, Pietsch H, Urwyler S, Tiaden A, Weber SS, Hilbi H. The *Legionella*  
824 *pneumophila* phosphatidylinositol-4 phosphate-binding type IV substrate SidC recruits  
825 endoplasmic reticulum vesicles to a replication-permissive vacuole. *Cell Microbiol*.  
826 2008;10:2416-33.
- 827 58. Haenssler E, Ramabhadran V, Murphy CS, Heidtman MI, Isberg RR. Endoplasmic  
828 reticulum tubule protein reticulon 4 associates with the *Legionella pneumophila* vacuole  
829 and with translocated substrate Ceg9. *Infect Immun*. 2015;83:3479-89.
- 830 59. Steiner B, Swart AL, Welin A, Weber S, Personnic N, Kaech A, et al. ER remodeling by  
831 the large GTPase atlastin promotes vacuolar growth of *Legionella pneumophila*. *EMBO*  
832 *Rep*. 2017;18:1817-36.
- 833 60. Pemberton JG, Kim YJ, Balla T. Integrated regulation of the phosphatidylinositol cycle  
834 and phosphoinositide-driven lipid transport at ER-PM contact sites. *Traffic*. 2020;21:200-  
835 19.
- 836 61. Mesmin B, Bigay J, Moser von Filseck J, Lacas-Gervais S, Drin G, Antony B. A four-  
837 step cycle driven by PI(4)P hydrolysis directs sterol/PI(4)P exchange by the ER-Golgi  
838 tether OSBP. *Cell*. 2013;155:830-43.
- 839 62. Zewe JP, Wills RC, Sangappa S, Goulden BD, Hammond GR. SAC1 degrades its lipid  
840 substrate PtdIns4P in the endoplasmic reticulum to maintain a steep chemical gradient  
841 with donor membranes. *eLife*. 2018;7.
- 842 63. Chung J, Torta F, Masai K, Lucast L, Czaplá H, Tanner LB, et al.  
843 PI4P/phosphatidylserine countertransport at ORP5- and ORP8-mediated ER-plasma  
844 membrane contacts. *Science*. 2015;349:428-32.

- 845 64. Moser von Filseck J, Copic A, Delfosse V, Vanni S, Jackson CL, Bourguet W, et al.  
846 Phosphatidylserine transport by ORP/Osh proteins is driven by phosphatidylinositol 4-  
847 phosphate. *Science*. 2015;349:432-6.
- 848 65. Mesmin B, Bigay J, Polidori J, Jamecna D, Lacas-Gervais S, Antony B. Sterol transfer,  
849 PI4P consumption, and control of membrane lipid order by endogenous OSBP. *EMBO J*.  
850 2017;36:3156-74.
- 851 66. Hüsler D, Steiner B, Welin A, Striednig B, Swart AL, Molle V, et al. *Dictyostelium*  
852 lacking the single atlastin homolog Sey1 shows aberrant ER architecture, proteolytic  
853 processes and expansion of the *Legionella*-containing vacuole. *Cell Microbiol*.  
854 2021:e13318.
- 855 67. Rivero F, Kuspa A, Brokamp R, Matzner M, Noegel AA. Interaptin, an actin-binding  
856 protein of the alpha-actinin superfamily in *Dictyostelium discoideum*, is developmentally  
857 and cAMP-regulated and associates with intracellular membrane compartments. *J Cell*  
858 *Biol*. 1998;142:735-50.
- 859 68. Peracino B, Wagner C, Balest A, Balbo A, Pergolizzi B, Noegel AA, et al. Function and  
860 mechanism of action of *Dictyostelium* Nramp1 (Slc11a1) in bacterial infection. *Traffic*.  
861 2006;7:22-38.
- 862 69. Buracco S, Peracino B, Cinquetti R, Signoretto E, Vollero A, Imperiali F, et al.  
863 *Dictyostelium* Nramp1, which is structurally and functionally similar to mammalian  
864 DMT1 transporter, mediates phagosomal iron efflux. *J Cell Sci*. 2015;128:3304-16.
- 865 70. Riyahi TY, Frese F, Steinert M, Omosigho NN, Glockner G, Eichinger L, et al. RpkA, a  
866 highly conserved GPCR with a lipid kinase domain, has a role in phagocytosis and anti-  
867 bacterial defense. *PLoS One*. 2011;6:e27311.
- 868 71. Luo ZQ, Isberg RR. Multiple substrates of the *Legionella pneumophila* Dot/Icm system  
869 identified by interbacterial protein transfer. *Proc Natl Acad Sci U S A*. 2004;101:841-6.

- 870 72. Finsel I, Ragaz C, Hoffmann C, Harrison CF, Weber S, van Rahden VA, et al. The  
871 *Legionella* effector RidL inhibits retrograde trafficking to promote intracellular  
872 replication. *Cell Host Microbe*. 2013;14:38-50.
- 873 73. Sreelatha A, Nolan C, Park BC, Pawlowski K, Tomchick DR, Tagliabracci VS. A  
874 *Legionella* effector kinase is activated by host inositol hexakisphosphate. *J Biol Chem*.  
875 2020.
- 876 74. Hsu F, Luo X, Qiu J, Teng YB, Jin J, Smolka MB, et al. The *Legionella* effector SidC  
877 defines a unique family of ubiquitin ligases important for bacterial phagosomal  
878 remodeling. *Proc Natl Acad Sci U S A*. 2014;111:10538-43.
- 879 75. Luo X, Wasilko DJ, Liu Y, Sun J, Wu X, Luo ZQ, et al. Structure of the *Legionella*  
880 virulence factor, SidC reveals a unique PI(4)P-specific binding domain essential for its  
881 targeting to the bacterial phagosome. *PLoS Pathog*. 2015;11:e1004965.
- 882 76. Dolinsky S, Haneburger I, Cichy A, Hannemann M, Itzen A, Hilbi H. The *Legionella*  
883 *longbeachae* Icm/Dot substrate SidC selectively binds phosphatidylinositol 4-phosphate  
884 with nanomolar affinity and promotes pathogen vacuole-endoplasmic reticulum  
885 interactions. *Infect Immun*. 2014;82:4021-33.
- 886 77. Derre I. Hijacking of membrane contact sites by intracellular bacterial pathogens. *Adv*  
887 *Exp Med Biol*. 2017;997:211-23.
- 888 78. Stanhope R, Derre I. Making contact: VAP targeting by intracellular pathogens. *Contact*.  
889 2018;1. doi: 10.1177/2515256418775512.
- 890 79. Stanhope R, Flora E, Bayne C, Derre I. IncV, a FFAT motif-containing *Chlamydia*  
891 protein, tethers the endoplasmic reticulum to the pathogen-containing vacuole. *Proc Natl*  
892 *Acad Sci U S A*. 2017;114:12039-44.
- 893 80. Derre I, Swiss R, Agaisse H. The lipid transfer protein CERT interacts with the  
894 *Chlamydia* inclusion protein IncD and participates to ER-*Chlamydia* inclusion membrane  
895 contact sites. *PLoS Pathog*. 2011;7:e1002092.

- 896 81. Elwell CA, Jiang S, Kim JH, Lee A, Wittmann T, Hanada K, et al. *Chlamydia*  
897 *trachomatis* co-opts GBF1 and CERT to acquire host sphingomyelin for distinct roles  
898 during intracellular development. PLoS Pathog. 2011;7:e1002198.
- 899 82. Weber S, Hilbi H. Live cell imaging of phosphoinositide dynamics during *Legionella*  
900 infection. Methods Mol Biol. 2014;1197:153-67.
- 901 83. Tiaden A, Spirig T, Weber SS, Brüggemann H, Bosshard R, Buchrieser C, et al. The  
902 *Legionella pneumophila* response regulator LqsR promotes host cell interactions as an  
903 element of the virulence regulatory network controlled by RpoS and LetA. Cell  
904 Microbiol. 2007;9:2903-20.
- 905 84. Welin A, Weber S, Hilbi H. Quantitative imaging flow cytometry of *Legionella*-infected  
906 *Dictyostelium* amoebae reveals the impact of retrograde trafficking on pathogen vacuole  
907 composition. Appl Environ Microbiol. 2018;84:e00158-18.
- 908 85. Welin A, Weber S, Hilbi H. Quantitative imaging flow cytometry of *Legionella*-  
909 containing vacuoles in dually fluorescence-labeled *Dictyostelium*. Methods Mol Biol.  
910 2019;1921:161-77.
- 911 86. Urwyler S, Finsel I, Ragaz C, Hilbi H. Isolation of *Legionella*-containing vacuoles by  
912 immuno-magnetic separation. Curr Prot Cell Biol. 2010;Chapter 3, unit 3 34.
- 913 87. Hoffmann C, Finsel I, Hilbi H. Pathogen vacuole purification from *Legionella*-infected  
914 amoeba and macrophages. Methods Mol Biol. 2013;954:309-21.
- 915 88. Bonn F, Bartel J, Buttner K, Hecker M, Otto A, Becher D. Picking vanished proteins  
916 from the void: how to collect and ship/share extremely dilute proteins in a reproducible  
917 and highly efficient manner. Anal Chem. 2014;86:7421-7.
- 918 89. Perez-Riverol Y, Csordas A, Bai J, Bernal-Llinares M, Hewapathirana S, Kundu DJ, et  
919 al. The PRIDE database and related tools and resources in 2019: improving support for  
920 quantification data. Nucleic Acids Res. 2019;47:D442-D50.

921 **Table 1.** Features of selected *D. discoideum* MCS components.

| MCS component          | Colocalization             |                             |                           | <i>Legionella</i> Icm <sup>a</sup> |
|------------------------|----------------------------|-----------------------------|---------------------------|------------------------------------|
|                        | Calnexin (ER) <sup>a</sup> | P4C (PI4P/LCV) <sup>a</sup> | AmtA (PM/EE) <sup>a</sup> |                                    |
| Vap                    | ++                         | ++                          | +                         | positive                           |
| OSBP7 ( <i>osbG</i> )  | ++/- <sup>b</sup>          | -                           | -                         | no effect                          |
| OSBP8 ( <i>osbH</i> )  | ++                         | -                           | -                         | negative                           |
| OSBP11 ( <i>osbK</i> ) | -                          | ++                          | ++                        | positive                           |
| Sac1                   | ++                         | -                           | -                         | no effect                          |
| Sac1_C383S             | ++                         | -                           | -                         | no effect                          |
| Sac1_ΔTMD              | -                          | -                           | -                         | negative                           |

922 <sup>a</sup> Abbreviations: Icm, intracellular multiplication of *L. pneumophila* in *D. discoideum*  
 923 producing the Sac1 variants or lacking *vap*, *osbG*, *osbH* or *osbK*, compared to replication in  
 924 the parental strain Ax3; ER, endoplasmic reticulum; EE, early endosome; PI4P/LCV,  
 925 phosphatidylinositol 4-phosphate/*Legionella*-containing vacuole; PM, plasma membrane.

926 <sup>b</sup> +: co-localization in *L. pneumophila*-infected cells; -: no co-localization in uninfected cells.

927

928 **Figure Legends**

929 **Figure 1.** *D. discoideum* MCS components localizing to LCVs.

930 (A) Comparative proteomics was performed by mass spectrometry with LCVs purified from  
931 *L. pneumophila*-infected *D. discoideum* Ax3 or  $\Delta$ sey1 (for details see Materials and Methods).  
932 Among the total of 3658 eukaryotic or bacterial proteins identified, the Venn diagrams show  
933 proteins identified in biological triplicates only on LCVs from *D. discoideum* Ax3 (108  
934 proteins; 74 *D. discoideum*, 34 *L. pneumophila*) or only on LCVs from  $\Delta$ sey1 mutant amoeba  
935 (14 proteins; 11 *D. discoideum*, 3 *L. pneumophila*). (B) Imaging flow cytometry (IFC) of *D.*  
936 *discoideum* Ax3 or  $\Delta$ sey1 producing P4C-mCherry (pWS032) and GFP fusion proteins of  
937 Vap, OSBP7, OSBP8, OSBP11, or Sac1, infected (MOI 5, 1 h) with mPlum-producing *L.*  
938 *pneumophila* JR32 (pAW014). Mean IFC colocalization score and standard error of mean  
939 (SEM) for MCS component GFP fusion proteins for > 5000 LCVs is depicted. The data are  
940 representative for three independent experiments (\*\*P<0.001).

941

942 **Figure 2.** *Dictyostelium discoideum* MCS components localize to LCVs and/or ER.

943 (A) Dually labeled *D. discoideum* amoebae producing MCS components fused to GFP, and  
944 either calnexin (CnxA)-mCherry (pAW012), P4C-mCherry (pWS032), or AmtA-mCherry  
945 were infected (MOI 5, 2 h) with mCerulean-producing *L. pneumophila* JR32 (pNP99), fixed  
946 with 4 % PFA, and imaged by confocal fluorescence microscopy. Merged images are shown.  
947 Scale bars: 3  $\mu$ m. The Pearson's correlation coefficient was generated using Coloc 2 from Fiji  
948 (ImageJ) and is shown for MCS components fused to GFP with respect to (B) CnxA-  
949 mCherry, (C) P4C-mCherry, or (D) AmtA-mCherry.

950

951 **Figure 3.** MCS components modulate replication of *Legionella pneumophila* in *Dictyostelium*  
952 *discoideum* and mammalian cells.

953 (A) *D. discoideum* Ax3, or the  $\Delta vap$ ,  $\Delta osbG$ ,  $\Delta osbH$ , or  $\Delta osbK$  mutant strains producing GFP  
954 (pDM317) or GFP fusions of the MCS components were infected (MOI 1) with mCherry-  
955 producing *L. pneumophila* JR32 (pNP102), and intracellular replication was assessed by  
956 relative fluorescence units (RFU). Mean and SEM of three independent experiments are  
957 shown (\*P<0.05; \*\*P<0.01; \*\*\*P<0.001). (B) *D. discoideum* Ax3 producing CnxA-GFP  
958 (pAW016), GFP-Sac1 (pLS037), GFP-Sac1\_C383S (pSV015) or GFP-Sac1\_ΔTMD  
959 (pSV034) were infected (MOI 1) with mCherry-producing *L. pneumophila* JR32 (pNP102),  
960 and intracellular replication was assessed by relative fluorescence units (RFU). Mean and  
961 SEM of three independent experiments are shown (\*\*\*P<0.001). (C) RAW 264.7  
962 macrophages were treated with increasing concentrations of OSW-1 (0-100 nM, 1-60 h),  
963 infected (MOI 1) with GFP-producing *L. pneumophila* JR32 (pNT28), and intracellular  
964 replication was assessed by relative fluorescence units (RFU). Mean and SEM of three  
965 independent experiments are shown (\*P<0.05; \*\*\*P<0.001). (D) A549 epithelial cells  
966 transfected for 48 h with 10 nM siRNA oligonucleotides were infected (MOI 10) with GFP-  
967 producing *L. pneumophila* JR32 or  $\Delta icmT$  (pNT28), and intracellular replication was assessed  
968 by fluorescence with a microplate reader. Growth after 24 h was compared to growth at 1 h.  
969 Mean and SEM of three independent experiments are shown (\*\*P<0.01).

970

971 **Figure 4.** *Vap*, *OSBP11*, and *Sac1* promote expansion of PtdIns(4)*P*-positive LCVs.

972 (A) Dually labeled *D. discoideum* Ax3,  $\Delta vap$ ,  $\Delta osbG$ ,  $\Delta osbH$ ,  $\Delta osbK$  or  $\Delta sey1$  mutants  
973 producing P4C-mCherry (pWS032) and CnxA-GFP (pAW016), or Ax3 producing P4C-  
974 mCherry and either GFP-Sac1 (pLS037), GFP-Sac1\_C383S (pSV015) or GFP-Sac1\_ΔTMD  
975 (pSV034) were infected (MOI 5, 2-16 h) with mCerulean-producing *L. pneumophila* JR32  
976 (pNP99) and fixed with 4 % PFA. Merged images for the analyzed time points are shown.  
977 Scale bars: 3 μm. (B) LCV area was measured using ImageJ (n=100-200 per condition from 3

978 independent biological replicates). Means and SEM of single cells are shown (\*\*P<0.01;  
979 \*\*\*P<0.001).

980

981 **Figure 5.** Sac1\_ΔTMD reduces the accumulation of PtdIns(4)P, Vap and OSBP8 on LCVs.

982 (A) Dually labeled *D. discoideum* Ax3, Δvap, ΔosbG, ΔosbH, ΔosbK or Δsey1 mutants  
983 producing P4C-mCherry (pWS032) and GFP-Sac1 (pLS037) were infected (MOI 5, 2-16 h)  
984 with mCerulean-producing *L. pneumophila* JR32 (pNP99) and fixed with 4 % PFA. Merged  
985 images for the analyzed time points are shown. Scale bars: 3 μm. (B, C) Imaging flow  
986 cytometry (IFC) analysis of dually labeled *D. discoideum* Ax3, Δvap, ΔosbG, ΔosbH, ΔosbK  
987 or Δsey1 mutants producing P4C-mCherry (pWS032) and either GFP-Sac1 (pLS037) or GFP-  
988 Sac1\_ΔTMD (pSV034), infected (MOI 5, 2 h) with mPlum-producing *L. pneumophila* JR32  
989 (pAW014). (D) Dually labeled *D. discoideum* Ax3 producing GFP fusions of MCS  
990 components and either mCherry-Sac1 (pSV044) or mCherry-Sac1\_ΔTMD (pSV045) were  
991 infected (MOI 5, 2 h) with mCerulean-producing *L. pneumophila* JR32 (pNP99) and fixed  
992 with 4 % PFA. Merged images for the analyzed time points are shown. Scale bars: 3 μm. (E)  
993 IFC analysis of dually labeled *D. discoideum* Ax3 producing GFP fusions of MCS  
994 components and either mCherry-Sac1 (pSV044) or mCherry-Sac1\_ΔTMD (pSV045), infected  
995 (MOI 5, 2 h) with mPlum-producing *L. pneumophila* JR32 (pAW014). Quantification of (B)  
996 P4C-mCherry (C) Sac1-GFP or (E) GFP fusions of MCS components localizing to LCVs at 2  
997 h p.i. Due to the lower resolution of IFC, “LCVs” designates the LCV limiting membrane and  
998 tightly attached ER. Number of events per sample, n = 5000. Data represent mean and SEM  
999 of three independent experiments (\*P<0.05; \*\*P<0.01; \*\*\*P<0.001).

1000

1001 **Figure 6.** The *L. pneumophila* effectors LepB and SidC determine PtdIns(4)P decoration and  
1002 expansion of LCVs.



1003 (A) Dually labeled *D. discoideum* Ax3 producing P4C-mCherry (pWS032) and either CnxA-  
1004 GFP (pAW016), GFP-Sac1 (pLS037), or GFP-Sac1\_ΔTMD (pSV034) were infected (MOI 5,  
1005 1-8 h) with mCerulean-producing *L. pneumophila* JR32, Δ*lepB* or Δ*sidC* (pNP99) and fixed  
1006 with 4 % PFA. Merged images for the analyzed time points are shown. Scale bars: 3 μm. (B)  
1007 LCV area was measured using ImageJ (n=100-200 per condition). Means and SEM of single  
1008 cells are shown (\*\*P<0.01; \*\*\*P<0.001). (C) Imaging flow cytometry (IFC) analysis of  
1009 dually labeled *D. discoideum* Ax3 producing P4C-mCherry (pWS032) and either CnxA-GFP  
1010 (pAW016), GFP-Sac1 (pLS037), or GFP-Sac1\_ΔTMD (pSV034), infected (MOI 5, 1-8 h)  
1011 with mPlum-producing *L. pneumophila* JR32 (pAW014). Number of events per sample, n =  
1012 5000. Data represent mean and SEM of three independent experiments (\*P<0.05; \*\*P<0.01;  
1013 \*\*\*P<0.001).

1014

1015 **Figure 7.** Localization and function of host and bacterial factors at LCV-ER MCS.

1016 In dually fluorescence-labeled *D. discoideum* amoeba MCS components such as Vap, OSBPs  
1017 and Sac1 localize to the LCV-ER interface. The host proteins Vap, OSBP8, Sac1 and Sey1  
1018 localize to the ER, and OSBP11 is detected on the PtdIns(4)P-positive LCV membrane as  
1019 well as on the PM. The MCS components are implicated in intracellular growth of *L.*  
1020 *pneumophila* and LCV remodeling. The PtdIns(4)P 4-phosphatase Sac1 lacking its membrane  
1021 anchor, Sac1\_ΔTMD, or the lack of the *L. pneumophila* PtdIns(3)P 4-kinase, LepB, reduced  
1022 the PtdIns(4)P score on LCV-ER MCS. These findings suggest that a *Legionella*- and host  
1023 cell-driven PtdIns(4)P gradient at LCV-ER MCS promotes Vap-, OSBP- and Sac1-dependent  
1024 pathogen vacuole remodeling.

1025

1026 **Supplementary Figures**

1027 **Figure S1.** Phylogenetic tree of short OSBPs from *D. discoideum*, *Saccharomyces cerevisiae*  
1028 and humans.

1029 Sequences of all proteins were either derived from dictybase.org or uniprot and aligned with  
1030 MAFFT (<https://mafft.cbrc.jp>) using the G-INS-I strategy, unalignlevel 0.8 and “leave gappy  
1031 regions” to generate a phylogenetic tree in phylo.ilo using NJ conserved sites and the JTT  
1032 substitution model. Numbers on the branches indicate bootstrap support for nodes from 100  
1033 bootstrap replicates.

1034

1035 **Figure S2.** *Dictyostelium discoideum* MCS components localize to LCVs and/or ER.

1036 (A) Dually labeled *D. discoideum* amoebae producing MCS components fused to GFP and  
1037 either CnxA-mCherry (pAW016), P4C-mCherry (pWS032), or AmtA-mCherry were infected  
1038 (MOI 5, 2 h) with mCerulean-producing *L. pneumophila* JR32 (pNP99), fixed with 4 % PFA,  
1039 and imaged by confocal fluorescence microscopy. Single channels are shown. scale bars: 3  
1040  $\mu\text{m}$ . The Pearson’s correlation coefficient of uninfected cells was generated using Coloc 2  
1041 from Fiji (ImageJ) and is shown for MCS components fused to GFP with respect to (B)  
1042 CnxA-mCherry, (C) P4C-mCherry, or (D) AmtA-mCherry. Data represent mean and SEM of  
1043 three independent experiments (\* $P < 0.05$ ; \*\*\* $P < 0.001$ ).

1044

1045 **Figure S3.** Construction of *D. discoideum* deletion mutants.

1046 Schematic representation of the strategies followed for the construction of *D. discoideum*  
1047 strains lacking (A) *osbG*, (B) *osbH*, (C) *osbK*, or (D) *vap*, and PCR-based validation.

1048

1049 **Figure S4.** MCS components modulate replication of *L. pneumophila* in *D. discoideum* and  
1050 mammalian cells.

1051 (A) *D. discoideum* Ax3, or  $\Delta vap$ ,  $\Delta osbG$ ,  $\Delta osbH$ , or  $\Delta osbK$  mutants producing GFP-Sac1  
1052 (pLS037) or GFP-Sac1\_ΔTMD (pSV034) were infected (MOI 1) with mCherry-producing *L.*  
1053 *pneumophila* JR32 (pNP102), and intracellular replication was assessed by colony-forming  
1054 units (CFU). Mean and SEM of three independent experiments are shown (\* $P < 0.05$ ;

1055 \*\*P<0.01; \*\*\*P<0.001). To improve clarity, the different mutant strains are shown in separate  
1056 graphs, each depicting the same data for Ax3/GFP-Sac1. **(B)** Cytotoxicity toward A549 cells  
1057 of oligonucleotides targeting Arf1 and Sac1 (10 nM siRNA, 48 h) was determined by the  
1058 Zombie Aqua fixable viability kit (BioLegend) using flow cytometry. Percentage of Zombie-  
1059 positive cells is shown (means and SEM of triplicate experiments). Untreated cells were used  
1060 as a negative control, and treatment with 70% EtOH for 1 h served as positive control for cell  
1061 death. **(C)** A549 epithelial cells were treated with oligonucleotides targeting Sac1 (10 nM  
1062 siRNA, 48 h), and the efficiency of protein depletion was assessed by Western blot (WB) with  
1063 the antibodies indicated. Qiagen AllStars unspecific oligonucleotides (“Scrambled”, “Scr”)   
1064 were used to control for off-target effects, and GAPDH served as WB loading control. Data  
1065 are representative of two independent experiments.

1066

1067 **Figure S5.** Vap, OSBP11, and Sac1 promote expansion of PtdIns(4)*P*-positive LCVs.

1068 Dually labeled *D. discoideum* Ax3,  $\Delta vap$ ,  $\Delta osbG$ ,  $\Delta osbH$ ,  $\Delta osbK$  or  $\Delta sey1$  mutants producing  
1069 P4C-mCherry (pWS032) and CnxA-GFP (pAW016), or Ax3 producing P4C-mCherry and  
1070 either GFP-Sac1 (pLS037), GFP-Sac1\_C383S (pSV015) or GFP-Sac1\_ΔTMD (pSV034)  
1071 were infected (MOI 5, 2-16 h) with mCerulean-producing *L. pneumophila* JR32 (pNP99) and  
1072 fixed with 4 % PFA. Single channels for the analyzed time points are shown. Scale bars: 3  
1073 μm.

1074

1075 **Figure S6.** Localization of GFP-Sac1 in *D. discoideum* Ax3 or strains lacking MCS  
1076 components.

1077 Dually labeled *D. discoideum* Ax3,  $\Delta vap$ ,  $\Delta osbG$ ,  $\Delta osbH$ ,  $\Delta osbK$  or  $\Delta sey1$  mutants producing  
1078 P4C-mCherry (pWS032) and GFP-Sac1 (pLS037) were infected (MOI 5, 2-16 h) with  
1079 mCerulean-producing *L. pneumophila* JR32 (pNP99) and fixed with 4 % PFA. Single  
1080 channels for the analyzed time points are shown. Scale bars: 3 μm.

1081

1082 **Figure S7.** Localization of GFP-MCS components in *D. discoideum* wild-type producing  
1083 Sac1 or Sac1\_ΔTMD.

1084 Dually labeled *D. discoideum* Ax3 producing GFP fusions of MCS proteins and either  
1085 mCherry-Sac1 (pSV044) or mCherry-Sac1\_ΔTMD (pSV045) were infected (MOI 5, 2 h)  
1086 with mCerulean-producing *L. pneumophila* JR32 (pNP99) and fixed with 4 % PFA. Single  
1087 channels for the analyzed time points are shown. Scale bars: 3 μm.

1088

1089 **Figure S8.** The *L. pneumophila* effectors LepB and SidC determine PtdIns(4)*P* decoration  
1090 and expansion of LCVs.

1091 Dually labeled *D. discoideum* Ax3 producing P4C-mCherry (pWS032) and either CnxA-GFP  
1092 (pAW016), GFP-Sac1 (pLS037), or GFP-Sac1\_ΔTMD (pSV034) were infected (MOI 5, 1-8  
1093 h) with mCerulean-producing *L. pneumophila* JR32, Δ*lepB* or Δ*sidC* (pNP99) and fixed with  
1094 4 % PFA. Single channels for the analyzed time points are shown. Scale bars: 3 μm.

1095

1096 **Table S1.** Comparative proteomics of LCVs from *D. discoideum* Ax3 and Δ*sey1*.

1097

1098 **Table S2.** Cells, bacterial strains, and plasmids used in this study.

1099

1100 **Table S3.** Oligonucleotides used in this study.

**A**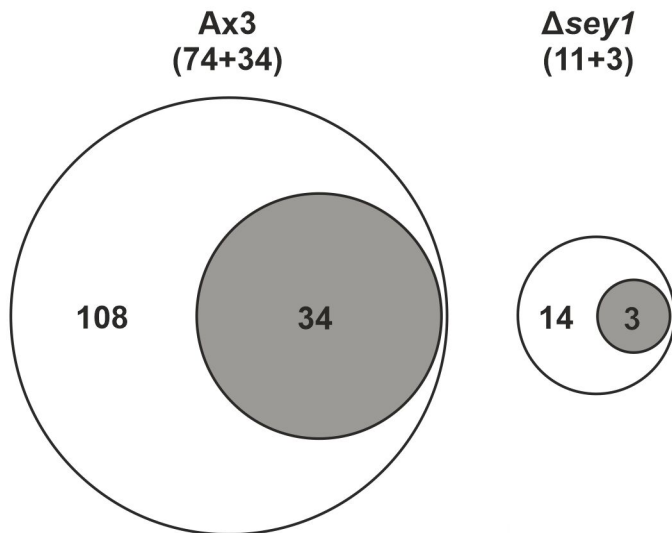**B**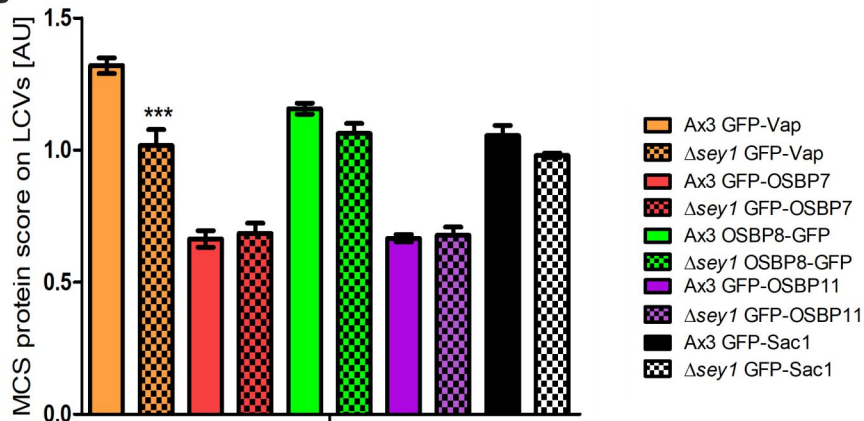

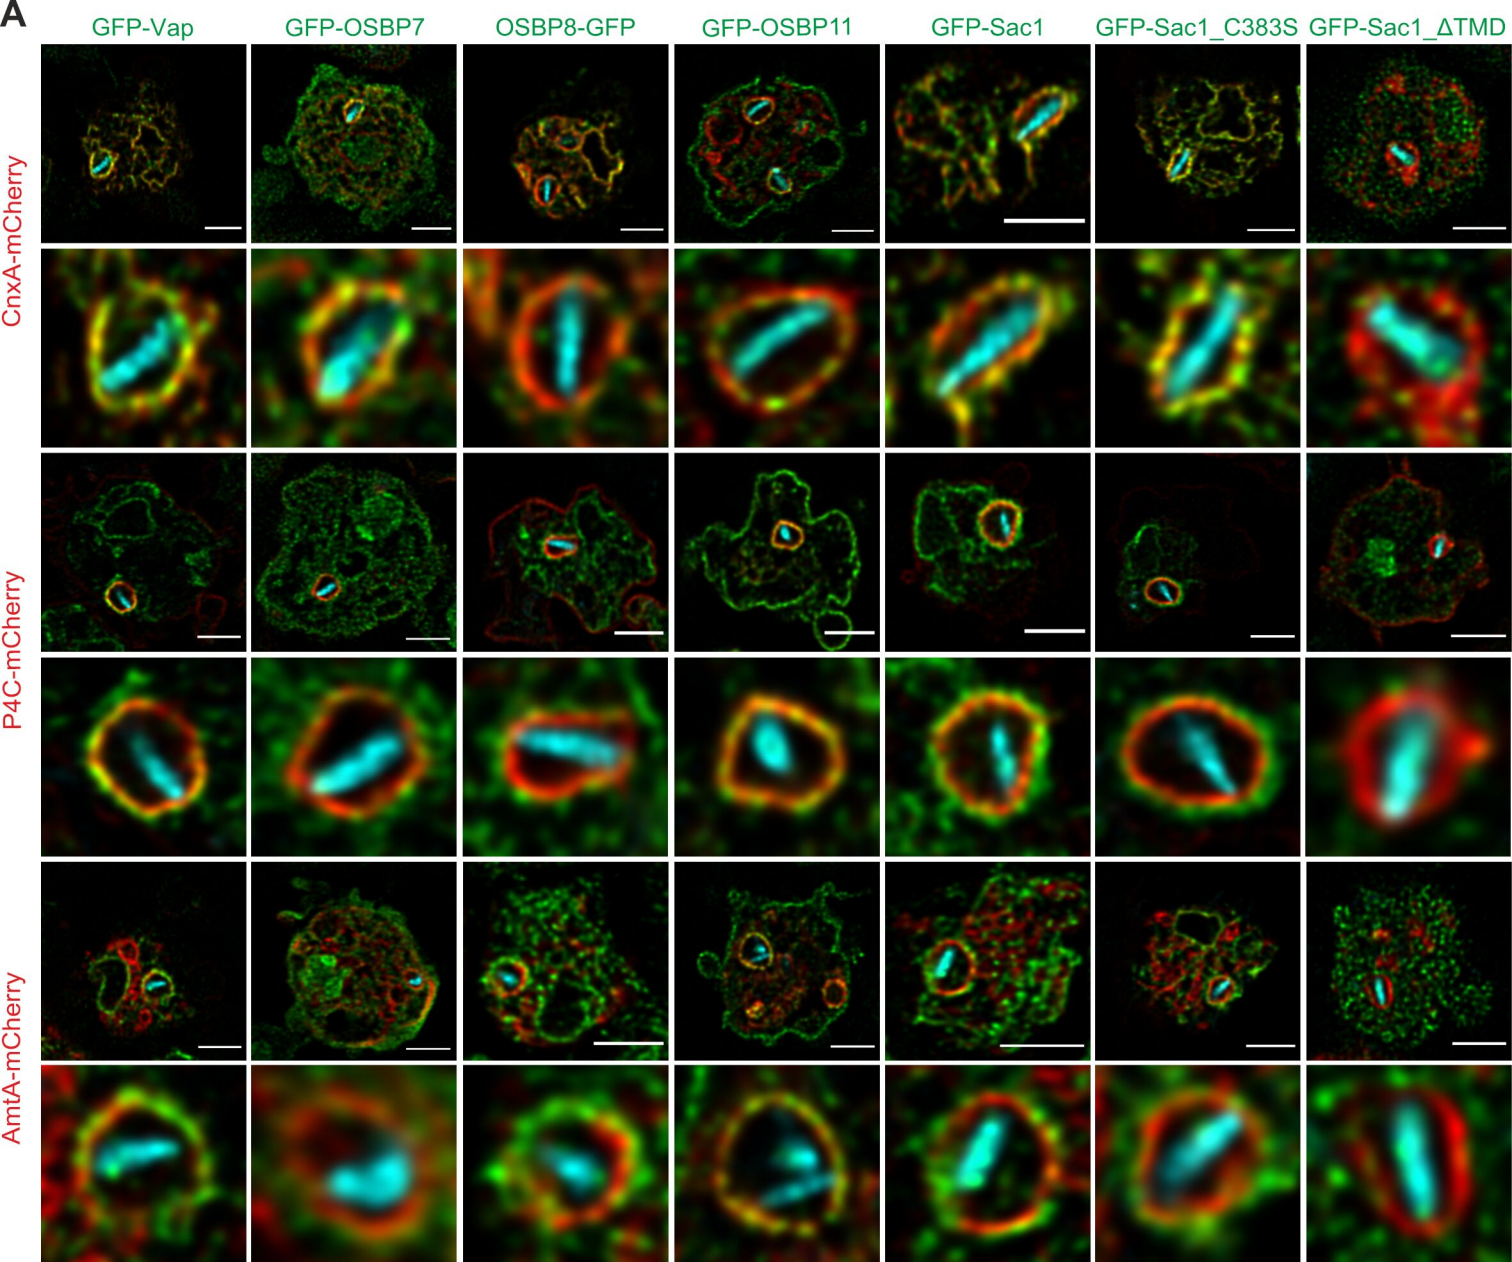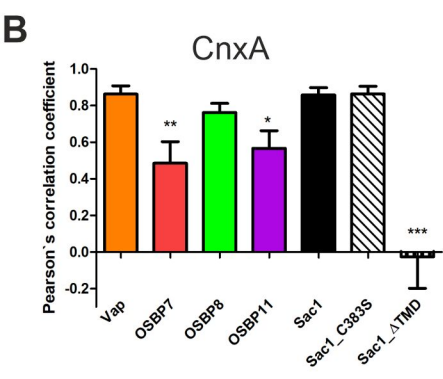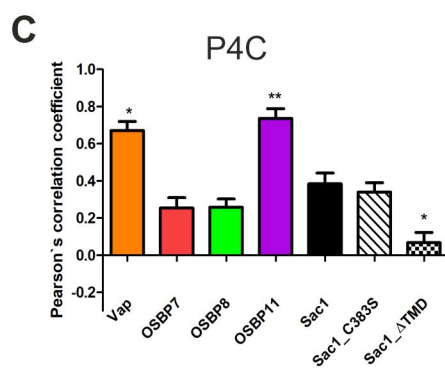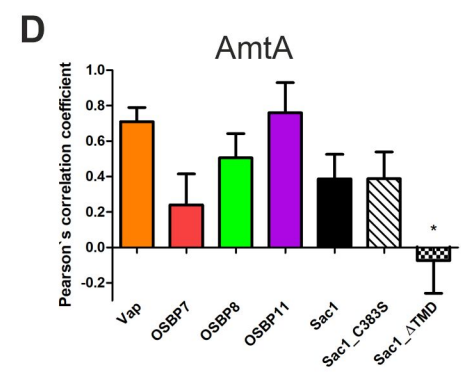

**A***D. discoideum*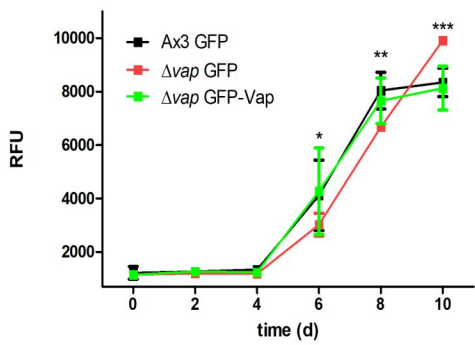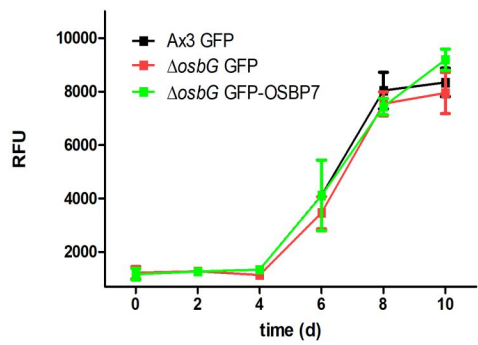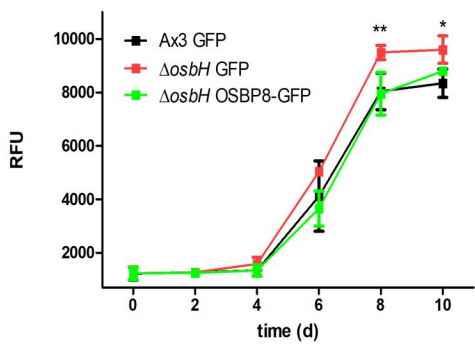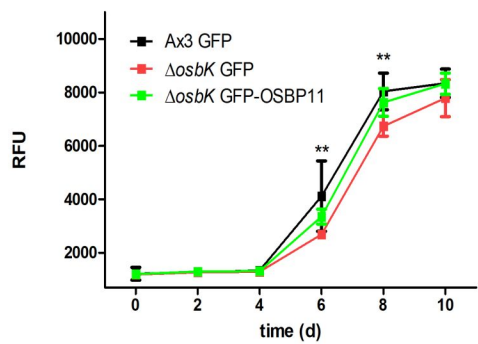**B***D. discoideum*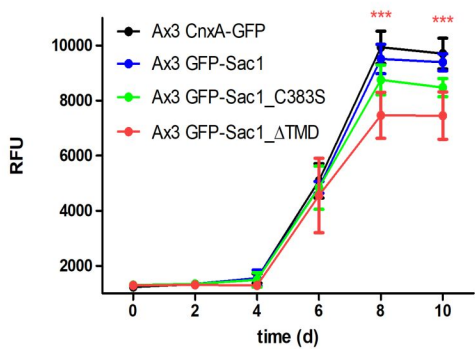**C**

RAW 264.7

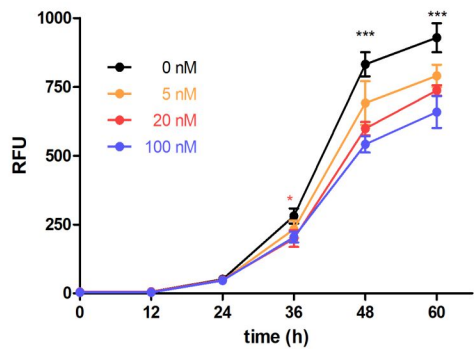**D**

A549

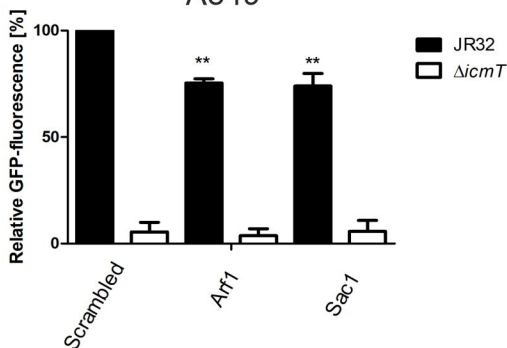

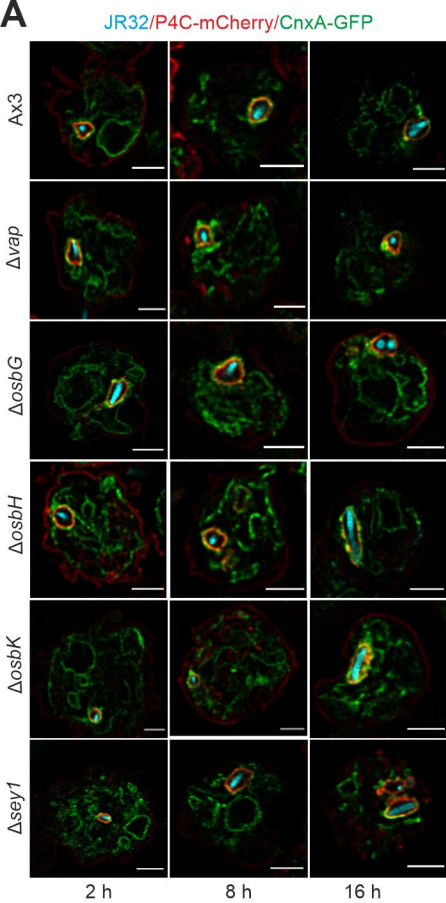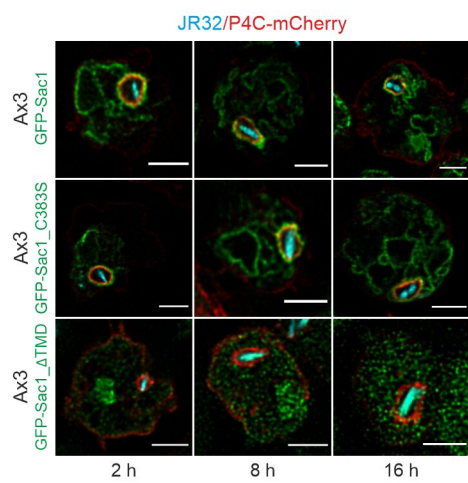

**B**

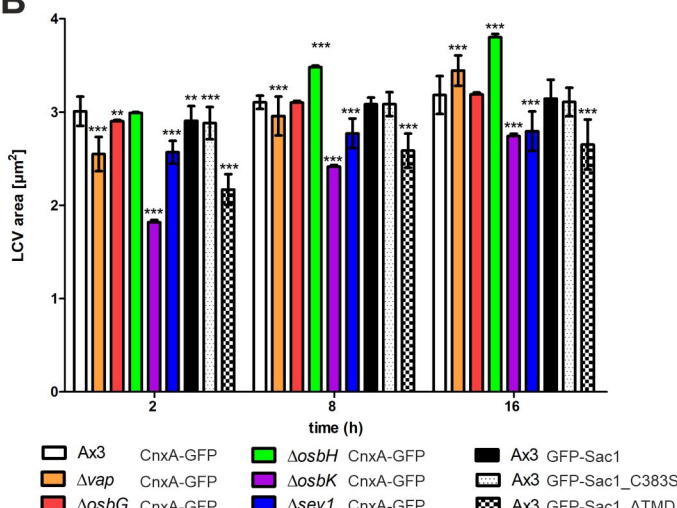



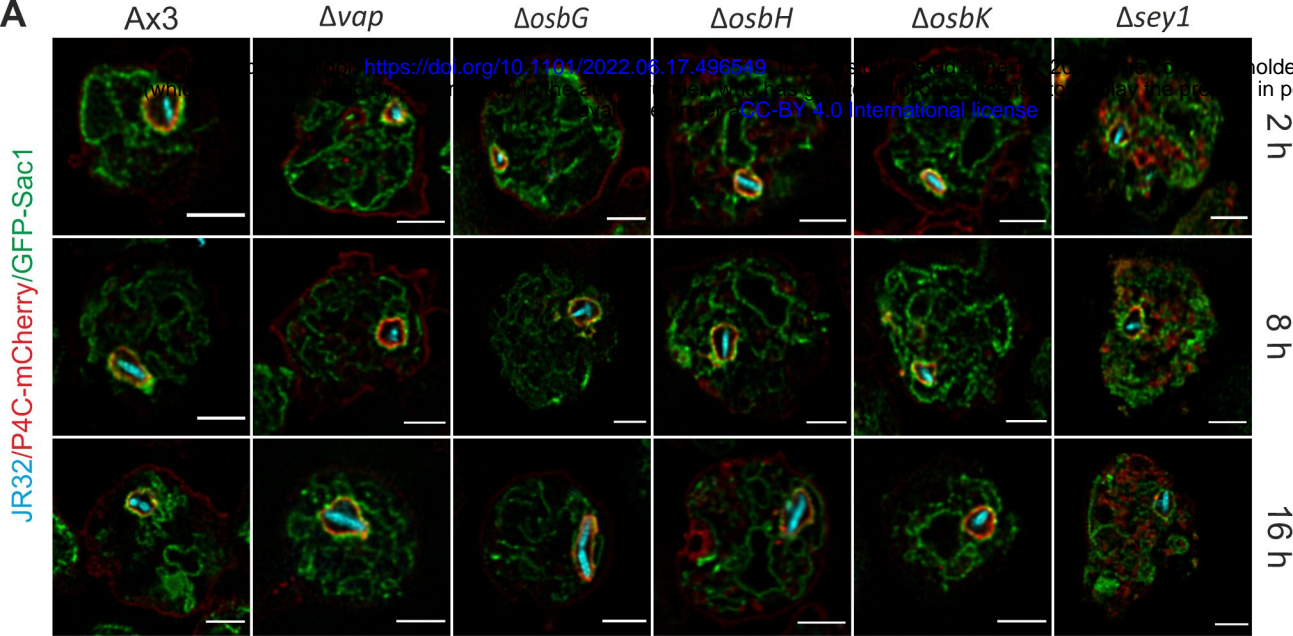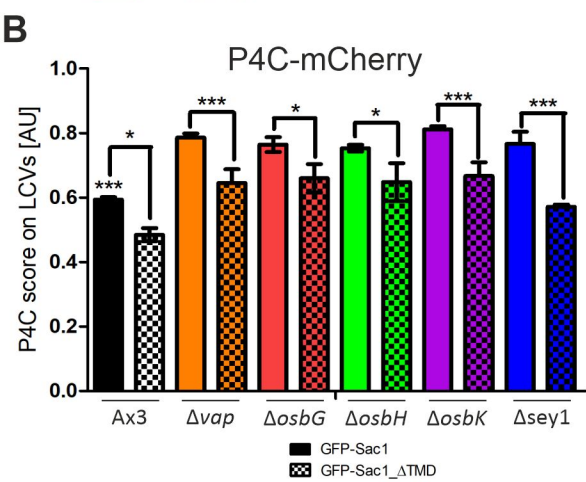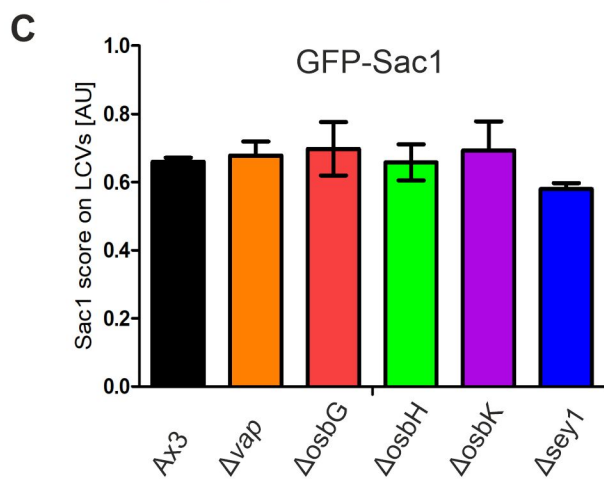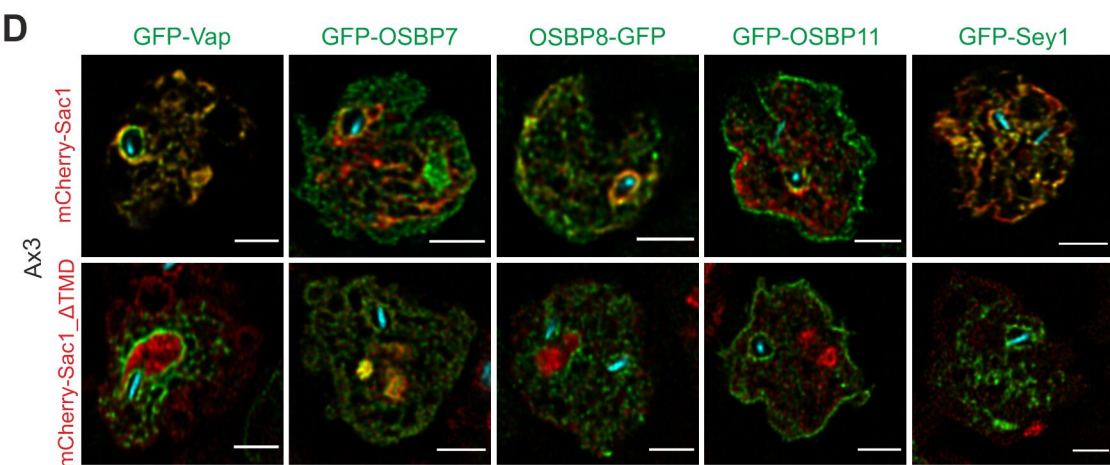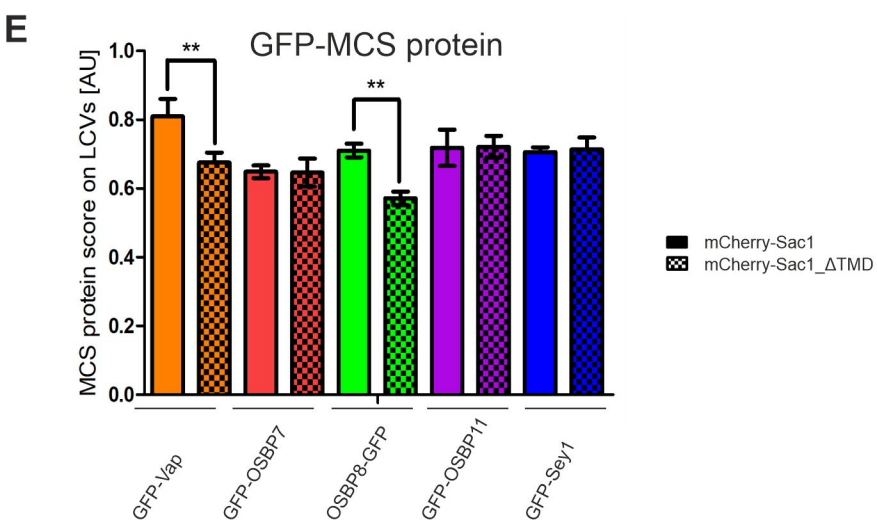

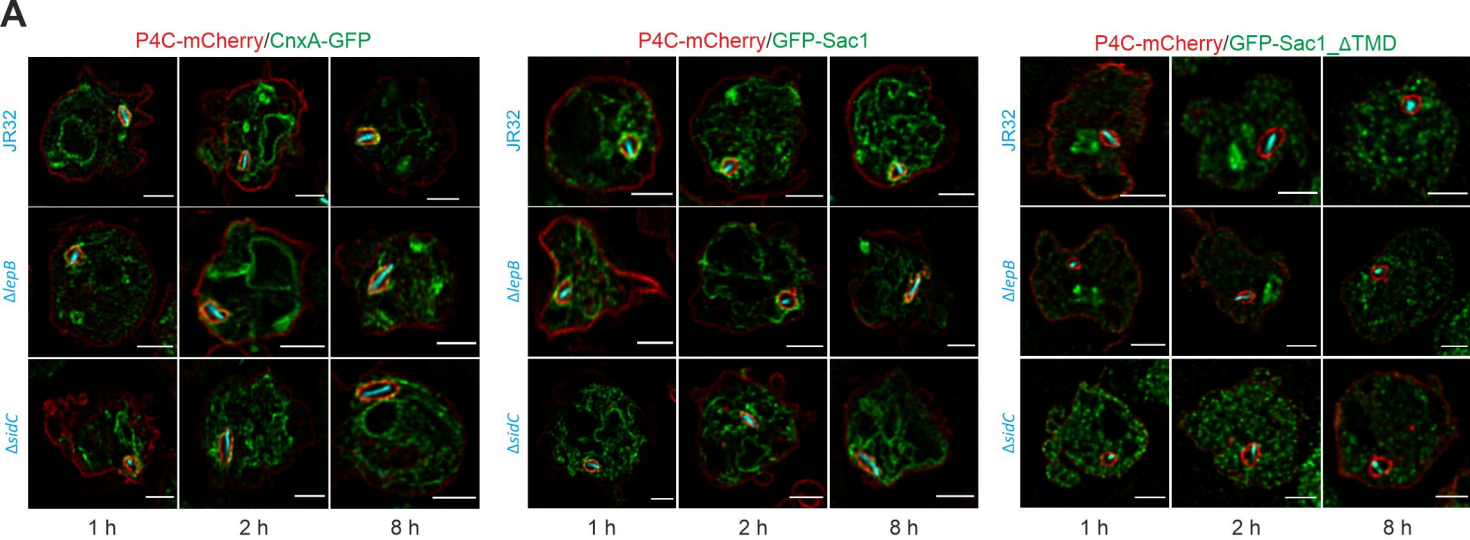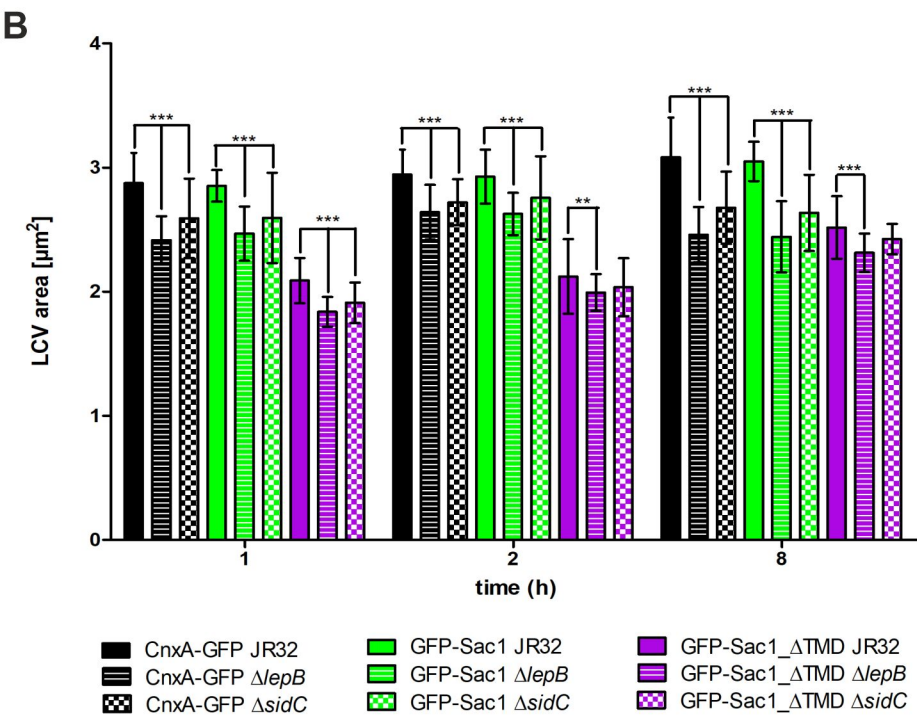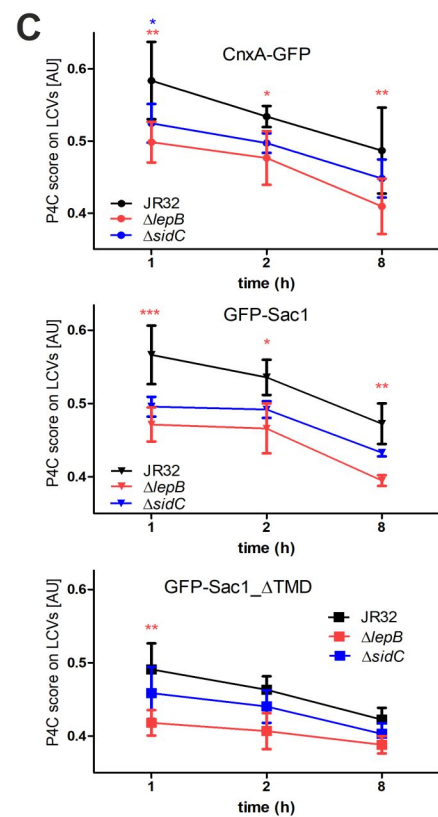

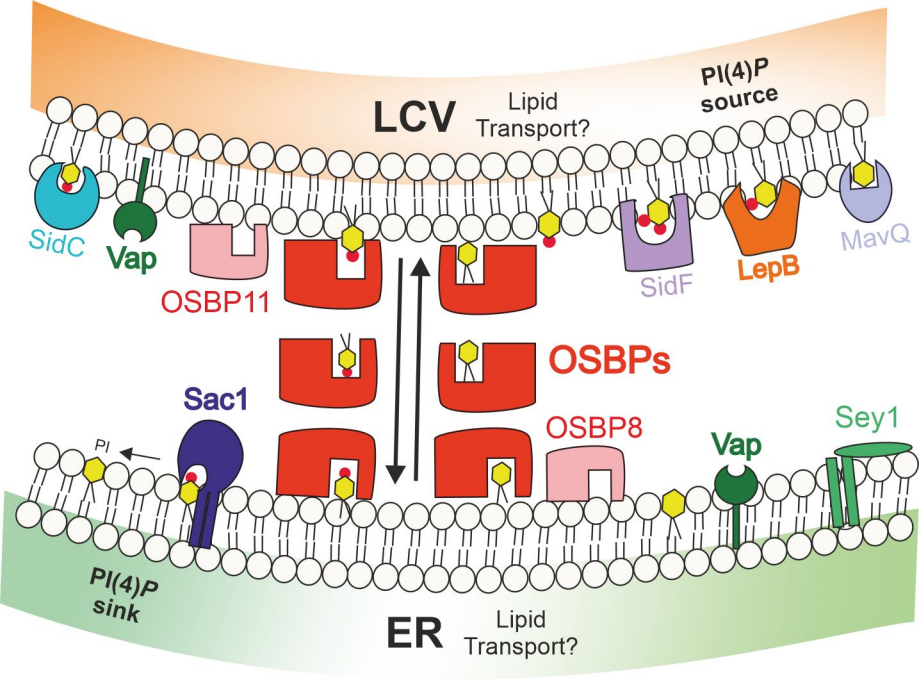

Source: https://www.biorxiv.org/content/10.1101/2022.06.17.496549v1.full.pdf
